# Supplementary material for: Breathlessness and “exacerbation” questions predictive for incident COPD (MARKO study): data after two years of follow-up
Source: PeerJ. 2023 Dec 18;11:e16650. doi: 10.7717/peerj.16650 (PMC10734450; doi:10.7717/peerj.16650)
Supplement: Supplemental Information 1 — The legend for variables is described in the first sheet. [file peerj-11-16650-s001.xlsx]

## Sheet: Metadata
	Variable Name	Visit	Explanation
	ID	V1	Identification number
	Sex (0-F)	V1	Sex (0-Female, 1-Male)
	Agev1 (yrs)	V1	Age in years at Visit1
	BHv1 (cm)	V1	Body height in cm
	BWv1 (kg)	V1	Body weight in kg
	BMIv1	V1	Body mass index - BW(kg)/BH(m)*2
	SM_ACTv1	V1	Active smoking (0-No, 1-Yes)
	p_yv1	V1	Smoking habit in pack-years (years of smoking*cigarettes per day/20)
	Atopyv1	V1	Atopy
	HTv1	V1	Hypertension
	DMv1	V1	Diabetes mellitus
	PEPSyv1	V1	Peptic syndrome
	DISLyv1	V1	Dyslipidemia
	PSIHv1	V1	Psychiatric disorder
	CMPv1	V1	Cardiomyopathy
	MI_CVIv1	V1	Miocardial infarction, Cerebrovascular infarction, TIA
	TMv1	V1	Tumor
	Horv1	V1	Hormonal disorder
	NEUv1	V1	Neurology disorder
	ChrInfv1	V1	Chronic inflammatory disorder
	Comv1 (No)	V1	Concomitant disease (number)
	ACE_ATv1	V1	ACE/AT inhibitors
	BBv1	V1	Beta blockers
	CaAv1	V1	Calcium antagonists
	Diuv1	V1	Diuretics
	HLv1	V1	Hipolipemics
	ThHorv1	V1	Thyroid hormones
	ASAv1	V1	Acetylsalicylic acid
	NSAIDv1	V1	Nonsteroidal antiinflammatory drugs
	Horv1	V1	Hormonal therapy
	ADMv1	V1	Antidiabetics
	Sedv1	V1	Sedatives
	IPPv1	V1	Proton pump inhibitors
	PSIHv1	V1	Antipsychotic drugs
	ChrThv1 (No)	V1	Chronic medication - number
	FamAtop	V1	Family atopy
	FamAstm	V1	Family asthma
	RespSyv1	V1	Respiratory symptoms
	Wheezev1	V1	Wheeze
	Coughv1	V1	Cough
	Phlemv1	V1	Phlem
	PhlemD/Wv1 (d/w)	V1	Phlem - present days per week
	Phlem/mv1 (m)	V1	Phlem - months per year
	Phlem_D/Yv1	V1	Phlem - number of days per year
	NAv1	V1	Night awakening
	mMRCv1	V1	mMRC scale
	ChPainv1	V1	Chest pain
	LowEnerv1	V1	Low energy
	RespSounv1	V1	Respiratory sound on auscultation (1 - weakened)
	Expv1	V1	Expirium (1 - prolonged)
	BrochSouv1	V1	Bronchial sounds (1 - existing)
	BPSv1	V1	Systolic blood pressure (mmHg)
	BPDv1	V1	Diastolic blood pressure (mmHg)
	HRv1	V1	Heart rate at rest
	SP_FVCv1	V1	Forced vital capacity, FVC measured with spirometry
	SP_FEV1v1	V1	Forced expiratory volume at 1 second, FEV1 measured with spirometry
	SP_TIFFv1	V1	FEV1/FVC ratio
	SP_PEFv1	V1	Peak expiratory flow, PEF mesured with spirometry
	SP_MEF50v1	V1	Mid-expiratory flow at 50% FVC, MEF50 measured with spirometry
	SP_MEF25v1	V1	Mid-expiratory flow at 75% FVC, MEF25 measured with spirometry
	BD_FVCv1	V1	Post bronchodilator FVC
	BD_FEV1v1	V1	Post bronchodilator FEV1
	BD_TIFFv1	V1	Post bronchodilator FEV1/FVC
	BD_PEFv1	V1	Post bronchodilator PEF
	BD_MEF50v1	V1	Post bronchodilator MEF50
	BD_MEF25v1	V1	Post bronchodilator MEF25
	6MWT_Ud	V1	6 minute walking test, 6MWT - distance in m
	Troosters_	V1	6MWT predicted value according to Troosters
	6MWT_%T	V1	6MWT % predicted according to Troosters
	6MWT_sO2i	V1	Oxygen saturation at rest
	6MWT_sO2k	V1	Oxygen saturation at the end of 6MWT
	6MWT_Pi	V1	Heart rate at rest
	6MWT_Pk	V1	Heart rate at the end of 6MWT
	6MWT_BDi	V1	Dyspnea (BORG scale) at rest
	6MWT_BDk	V1	Dyspnea (BORG scale) the end of 6MWT
	6MWT_BUi	V1	Fatigue (BORG scale) at rest
	6MWT_BUk	V1	Fatigue (BORG scale) at the end of 6MWT
	DLCO%	V1	Diffusion capacity for CO %predicted
	KCO%	V1	Carbon monoxide transfer coefficient % predicted
	MQ1_1	V1	MARKO Questionnaire initial test Q1
	MQ1_2	V1	MARKO Questionnaire initial test Q2
	MQ1_3	V1	MARKO Questionnaire initial test Q3
	MQ1_4	V1	MARKO Questionnaire initial test Q4
	MQ1_5	V1	MARKO Questionnaire initial test Q5
	MQ1_6	V1	MARKO Questionnaire initial test Q6
	MQ1_7	V1	MARKO Questionnaire initial test Q7
	MQ1_8	V1	MARKO Questionnaire initial test Q8
	MQ1_9	V1	MARKO Questionnaire initial test Q9
	MQ1_10	V1	MARKO Questionnaire initial test Q10
	MQ1_11	V1	MARKO Questionnaire initial test Q11
	MQ1_12	V1	MARKO Questionnaire initial test Q12
	MQ1_13	V1	MARKO Questionnaire initial test Q13
	MQ1_14	V1	MARKO Questionnaire initial test Q14
	MQ1_15	V1	MARKO Questionnaire initial test Q15
	MQ1_16	V1	MARKO Questionnaire initial test Q16
	MQ1_17	V1	MARKO Questionnaire initial test Q17
	MQ1_18	V1	MARKO Questionnaire initial test Q18
	MQ1_U	V1	MARKO Questionnaire initial test total score
	MQ2_1	V1	MARKO Questionnaire retest Q1
	MQ2_2	V1	MARKO Questionnaire retest Q2
	MQ2_3	V1	MARKO Questionnaire retest Q3
	MQ2_4	V1	MARKO Questionnaire retest Q4
	MQ2_5	V1	MARKO Questionnaire retest Q5
	MQ2_6	V1	MARKO Questionnaire retest Q6
	MQ2_7	V1	MARKO Questionnaire retest Q7
	MQ2_8	V1	MARKO Questionnaire retest Q8
	MQ2_9	V1	MARKO Questionnaire retest Q9
	MQ2_10	V1	MARKO Questionnaire retest Q10
	MQ2_11	V1	MARKO Questionnaire retest Q11
	MQ2_12	V1	MARKO Questionnaire retest Q12
	MQ2_13	V1	MARKO Questionnaire retest Q13
	MQ2_14	V1	MARKO Questionnaire retest Q14
	MQ2_15	V1	MARKO Questionnaire retest Q15
	MQ2_16	V1	MARKO Questionnaire retest Q16
	MQ2_17	V1	MARKO Questionnaire retest Q17
	MQ2_18	V1	MARKO Questionnaire retest Q18
	MQ2_U	V1	MARKO Questionnaire retest total score
	CAT_U	V1	COPD Assessment Test, CAT
	WBC	V1	White blood cell count
	RBC	V1	Red blood cell count
	htc	V1	Hematocrit
	Hgb	V1	Hemoglobin
	hsCRP	V1	High sensitivity C-reactive protein
	SGQRv1	V1	Saint George Respitory Questionnaire, SGRQ
	SySv1	V1	SGRQ Symptom score
	ActSv1	V1	SGRQ Activity score
	ImpSv1	V1	SGRQ Impact score
	TotScv1	V1	SGRQ Total score
	EBTbv1	V1	Exhaled breath temperature, EBT at baseline
	EBTsv1	V1	EBT after a smoked cigarette
	EBTdv1	V1	Difference in EBT after a smoked cigarette
	Yrs from V1	V2	Time between visit 1 and visit 2 (yrs)
	Agev2	V2	Age in years at Visit 2
	BHv2	V2	Body height in cm at visit 2
	BWv2	V2	Body weight in kg at visit 2
	SM_Av2	V2	Active smoking at visit 2 (0-No, 1-Yes)
	p/y v2	V2	Smoking habit in pack-years at visit 2 (years of smoking*cigarettes per day/20)
	HTv2	V2	Hypertension visit 2
	DMv2	V2	Diabetes mellitus at visit 2
	PepSyv2	V2	Peptic syndrome at visit 2
	DisLyv2	V2	Dyslipidemia at visit 2
	PSIHv2	V2	Psychiatric disorder at visit 2
	CMPv2	V2	Cardiomyopathy at visit 2
	MI_CVIv2	V2	Miocardial infarction, Cerebrovascular infarction, TIA at visit 2
	TMv2	V2	Tumor at visit 2
	Horv2	V2	Hormonal disorder at visit 2
	Hepatv2	V2	Hepatic disorder at visit 2Neurology disorder
	CRNSv2	V2	Neurology disorder at visit 2
	Comv2 (No)	V2	Concomitant disease at visit 2 (number)
	ACE_ATv2	V2	ACE/AT inhibitors at visit 2
	BBv2	V2	Beta blockers at visit 2
	CaAv2	V2	Calcium antagonists at visit 2
	Diuv2	V2	Diuretics at visit 2
	HLv2	V2	Hipolipemics at visit 2
	ADMv2	V2	Antidiabetics at visit 2
	IPPv2	V2	Proton pump inhibitors at visit 2
	Psihv2	V2	Antipsychotic drugs at visit 2
	Horv2	V2	Hormonal therapy at visit 2
	NSAIDv2	V2	NSAID at visit 2
	Otherrxv2	V2	Other medications on visit 2
	ChrThv2 (No)	V2	Chronic medication at visit 2 (number)
	mMRCv2	V2	mMRC scale
	RespSounv2	V2	Respiratory sound on auscultation (1 - weakened)
	Expv2	V2	Expirium (1 - prolonged)
	BrochSouv2	V2	Bronchial sounds (1 - existing)
	SP_FVCv2	V2	Forced vital capacity, FVC measured with spirometry
	SP_FEV1v2	V2	Forced expiratory volume at 1 second, FEV1 measured with spirometry
	SP_TIFFv2	V2	FEV1/FVC ratio
	SP_PEFv2	V2	Peak expiratory flow, PEF mesured with spirometry
	SP_MEF50v2	V2	Mid-expiratory flow at 50% FVC, MEF50 measured with spirometry
	SP_MEF25v2	V2	Mid-expiratory flow at 75% FVC, MEF25 measured with spirometry
	BD_FVCv2	V2	Post bronchodilator FVC
	BD_FEV1v2	V2	Post bronchodilator FEV1
	BD_TIFFv2	V2	Post bronchodilator FEV1/FVC
	BD_PEFv2	V2	Post bronchodilator PEF
	BD_MEF50v2	V2	Post bronchodilator MEF50
	BD_MEF25v2	V2	Post bronchodilator MEF25
	MQ_1v2	V2	MARKO Questionnaire initial test Q1
	MQ_2v2	V2	MARKO Questionnaire initial test Q2
	MQ_3v2	V2	MARKO Questionnaire initial test Q3
	MQ_4v2	V2	MARKO Questionnaire initial test Q4
	MQ_5v2	V2	MARKO Questionnaire initial test Q5
	MQ_6v2	V2	MARKO Questionnaire initial test Q6
	MQ_7v2	V2	MARKO Questionnaire initial test Q7
	MQ_8v2	V2	MARKO Questionnaire initial test Q8
	MQ_9v2	V2	MARKO Questionnaire initial test Q9
	MQ_10v2	V2	MARKO Questionnaire initial test Q10
	MQ_11v2	V2	MARKO Questionnaire initial test Q11
	MQ_12v2	V2	MARKO Questionnaire initial test Q12
	MQ_13v2	V2	MARKO Questionnaire initial test Q13
	MQ_14v2	V2	MARKO Questionnaire initial test Q14
	MQ_15v2	V2	MARKO Questionnaire initial test Q15
	MQ_16v2	V2	MARKO Questionnaire initial test Q16
	MQ_17v2	V2	MARKO Questionnaire initial test Q17
	MQ_18v2	V2	MARKO Questionnaire initial test Q18
	MQ_Uv2	V2	MARKO Questionnaire initial test total score
	CAT_Uv2	V2	COPD Assessment Test, CAT (total score)
	SySv2	V2	SGRQ Symptom score
	ActSv2	V2	SGRQ Activity score
	ImpSv2	V2	SGRQ Impact score
	TotScv2	V2	SGRQ Total score

## Sheet: Data
ID	Sex (0-F)	Agev1 (yrs)	BHv1 (cm)	BWv1 (kg)	BMIv1	SM_ACTv1	p_yv1	Atopyv1	HTv1	DMv1	PEPSyv1	DISLyv1	PSIHv1	CMPv1	MI_CVIv1	TMv1	Horv1	NEUv1	ChrInfv1	Comv1 (No)	ACE_ATv1	BBv1	CaAv1	Diuv1	HLv1	ThHorv1	ASAv1	NSAIDv1	Horv1	ADMv1	Sedv1	IPPv1	PSIHv1	ChrThv1 (No)	FamAtop	FamAstm	RespSyv1	Wheezev1	Coughv1	Phlemv1	PhlemD/Wv1 (d/w)	Phlem/mv1 (m)	Phlem_D/Yv1	NAv1	mMRCv1	ChPainv1	LowEnerv1	RespSounv1	Expv1
258	0	32.9802	161	62	23.9188	1	20	0	0	0	0	0	0	0	0	0	0	0	0	0	0	0	0	0	0	0	0	0	0	0	0	0	0	0	0	0	1	1	1	1	2	4	32	0	1	0	0	0	0
133	0	33.4894	160	50	19.5312	1	21.25	1	0	0	0	0	0	0	0	0	0	0	0	0	0	0	0	0	0	0	0	0	0	0	0	0	0	0	1	1	0	0	0	0				0	0	0	0	0	1
76	0	34.7817	167	125	44.8205	1	35	0	1	1	0	0	0	0	0	0	0	0	0	2	0	1	0	0	0	0	0	0	0	1	0	0	0	2	0	0	0	0	0	0				0	0	0	0	1	0
392	0	34.8172	169	64	22.4082	1	10	0	0	0	0	0	0	0	0	0	0	0	0	0	0	0	0	0	0	0	0	0	0	0	0	0	0	0	0	1	1	1	1	1				0	1	0	1	0	0
283	1	35.7509	183	85	25.3815	1	44	0	0	0	0	0	0	0	0	0	0	0	0	0	0	0	0	0	0	0	0	0	0	0	0	0	0	0	0	0	1	0	1	1	3	12	144	0	0	0	0	1	1
348	0	35.7563	168	79	27.9904	1	30	0	0	0	0	0	0	0	0	0	0	0	0	0	0	0	0	0	0	0	0	0	0	0	0	0	0	0	0	0	1	1	1	0				1	1	0	1	0	1
368	1	36.1369	172	88	29.7458	1	34.5	0	0	0	0	0	0	0	0	0	0	0	0	0	0	0	0	0	0	0	0	0	0	0	0	0	0	0	0	0	1	1	1	1	7	2.5	70	0	1	0	1	0	1
253	0	36.334	169	83	29.0606	1	20	0	0	0	0	0	0	0	0	0	0	0	0	0	0	0	0	0	0	0	0	0	0	0	0	0	0	0	0	0	0	0	0	0				0	0	0	0	0	0
377	1	38.2067	180	85	26.2346	1	26.25	0	1	0	0	0	0	0	0	0	0	0	0	1	1	1	0	0	0	0	0	0	0	0	0	0	0	2	0	0	1	1	0	0				0	0	0	0	0	0
271	1	38.5873	189	85	23.7955	1	20	0	0	1	0	0	0	0	0	0	0	0	0	1	0	1	0	0	0	0	0	0	0	1	0	0	0	2	0	0	1	0	1	1	6	12	288	0	1	0	1	1	0
272	0	38.653	168	61	21.6128	1	21	0	0	0	0	0	0	0	0	0	0	0	0	0	0	0	0	0	0	0	0	0	0	0	0	0	0	0	0	0	0	0	0	0				0	2	0	1	0	0
327	0	38.6968	171	69	23.597	1	20	0	0	0	0	0	0	0	0	0	0	0	0	0	0	0	0	0	0	0	0	0	0	0	0	0	0	0	0	0	1	0	1	0				0	0	0	1	0	0
248	1	38.8008	181	68	20.7564	1	21	0	0	0	0	0	0	0	0	0	0	0	0	0	0	0	0	0	0	0	0	0	0	0	0	0	0	0	0	0	0	0	1	0				0	0	0	0	1	0
295	0	38.9131	176	140	45.1963	1	30	0	1	0	0	0	0	0	0	0	0	0	0	1	1	0	0	0	0	0	0	0	0	0	0	0	0	1	0	0	1	0	1	0				0	1	0	0	1	0
100	1	39.1786	185	86	25.1278	1	20	0	0	0	0	0	0	0	0	0	0	0	0	0	0	0	0	0	0	0	0	0	0	0	0	0	0	0	0	0	0	0	0	0				0	0	0	0	0	0
307	0	39.3101	174	100	33.0295	1	42	0	1	0	0	0	0	0	0	0	1	0	0	2	1	1	0	0	0	1	0	0	0	0	0	0	0	3	0	0	1	0	1	1	3	12	144	0	2	0	0	0	0
249	1	39.3539	176	110	35.5114	1	25	0	0	0	0	0	0	0	0	0	0	0	0	0	0	0	0	0	0	0	0	0	0	0	0	0	0	0	0	0	1	0	1	1	2.5	12	120	0	1	0	0	1	1
58	1	39.3867	195	88	23.1427	1	20	0	0	0	0	0	0	0	0	0	0	0	0	0	0	0	0	0	0	0	0	0	0	0	0	0	0	0	0	0	1	0	0	0				0	0	0	0	0	0
103	1	39.4552	180	76	23.4568	1	63	0	0	0	0	1	0	0	0	0	0	0	0	1	0	0	0	0	1	0	0	0	0	0	0	0	0	1	0	0	0	1	1	1	1	12	48	0	0	0	0	1	0
257	0	39.4908	172	76	25.6896	1	22	0	0	0	0	0	0	0	0	0	0	0	0	0	0	0	0	0	0	0	0	0	0	0	0	0	0	0	0	0	1	1	1	1	7	12	336	0	1	0	1	0	0
406	0	39.5209	165	59	21.6713	1	16.5	0	0	0	0	0	0	0	0	0	0	0	0	0	0	0	0	0	0	0	0	0	0	0	0	0	0	0	0	0	0	0	0	0				0	1	0	1	0	0
407	1	39.6742	183	104	31.055	1	20	0	0	0	0	0	0	0	0	0	0	0	0	0	0	0	0	0	0	0	0	0	0	0	0	0	0	0	0	0	0	0	0	0				0	1	0	0	0	0
261	0	39.7235	172	66	22.3094	1	21	0	0	0	0	0	1	0	0	0	0	0	0	1	0	0	0	0	0	0	1	0	0	0	0	0	0	1	0	0	1	0	1	1	2	12	96	0	0	0	0	0	0
300	0	39.8412	184	101	29.8322	1	21	0	0	0	0	0	0	0	0	0	0	0	0	0	0	0	0	0	0	0	0	0	0	0	0	0	0	0	0	0	0	0	0	0				0	1	0	0	0	0
297	0	39.8522	165	56	20.5693	1	30	0	0	0	0	0	0	0	0	0	0	0	0	0	0	0	0	0	0	0	0	0	0	0	0	0	0	0	0	0	1	0	1	0				0	0	0	1	0	0
275	1	39.9316	171	83	28.3848	1	22	0	1	0	0	0	0	0	0	0	0	0	0	1	1	0	1	0	0	0	0	0	0	0	0	0	0	2	0	0	1	1	1	1	2.5	12	120	0	0	0	0	1	0
200	1	39.9535	175	85	27.7551	1	16.5	0	0	0	0	0	0	0	0	0	0	0	0	0	0	0	0	0	0	0	0	0	0	0	0	0	0	0	0	0	1	0	1	1	3	2	24	0	1	0	1	0	0
119	1	40.0356	172	88	29.7458	1	40	0	0	0	0	0	0	0	0	0	0	0	0	0	0	0	0	0	0	0	0	0	0	0	0	0	0	0	0	0	0	0	1	0				1	0	0	0	0	0
110	0	40.0903	171	67	22.913	1	11.5	0	0	0	0	0	0	0	0	0	0	0	0	0	0	0	0	0	0	0	0	0	0	0	0	0	0	0	0	0	0	0	0	0				0	0	0	0	0	0
186	0	40.4846	173	60	20.0474	1	26	0	0	0	0	0	0	0	0	0	0	0	1	1	0	0	0	0	0	0	0	1	0	0	0	0	0	1	0	0	1	0	1	1	7	2	56	0	2	0	0	0	0
46	1	40.794	178	106	33.4554	1	27	0	0	0	0	0	0	0	0	0	0	0	0	0	0	0	0	0	0	0	0	0	0	0	0	0	0	0	0	0	1	1	0	0				0	1	0	0	1	0
123	1	40.9008	192	110	29.8394		37.5	0	0	0	0	1	0	0	0	0	0	0	0	1	0	0	0	0	1	0	0	0	0	0	0	0	0	1	0	0	0	0	1	0				0	0	0	0	0	0
224	0	41.0103	172	60	20.2812	1	11	1	0	0	0	0	0	0	0	0	1	0	0	1	0	0	0	0	0	0	0	0	0	0	0	0	0	0	0	0	0	0	0	0				0	0	0	0	0	0
306	0	41.1472	175	80	26.1224	1	20	0	0	0	0	0	0	0	0	0	0	0	0	0	0	0	0	0	0	0	0	0	0	0	0	0	0	0	0	0	1	1	1	0				0	2	0	1	0	0
50	0	41.2047	183	89	26.5759	1	27.5	0	0	0	0	0	0	0	0	0	0	0	0	0	0	0	0	0	0	0	0	0	0	0	0	0	0	0	0	0	1	1	1	1	5	12	240	0	0	0	0	0	0
25	1	41.2293	190	112	31.0249	1	40	0	0	0	0	0	0	0	0	0	0	0	0	0	0	0	0	0	0	0	0	0	0	0	0	0	0	0	0	0	0	0	0	0				0	0	0	1	0	0
289	0	41.2594	180	63	19.4444	1	27.5	0	0	0	0	0	0	0	0	0	0	0	0	0	0	0	0	0	0	0	0	0	0	0	0	0	0	0	0	0	1	1	0	0				0	0	0	0	0	0
131	1	41.295	177	61	19.4708	1	20	0	0	0	0	0	0	0	0	0	0	0	0	0	0	0	0	0	0	0	0	0	0	0	0	0	0	0	0	0	1	0	1	1	1	12	48	0	0	1	0	1	0
303	0	41.3087	167	62	22.231	1	33.75	0	0	0	0	0	0	0	0	0	0	0	0	0	0	0	0	0	0	0	0	0	0	0	0	0	0	0	0	0	0	0	0	0				0	2	0	0	0	0
9	0	41.3114	173	75	25.0593	1	22	0	0	0	0	0	0	0	0	0	0	0	0	0	0	0	0	0	0	0	0	0	0	0	0	0	0	0	0	0	0	0	0	0				0	2	0	1	0	0
399	0	41.3525	163	98	36.8851	1	50	0	0	0	0	0	0	0	0	0	0	0	0	0	0	0	0	0	0	0	0	0	0	0	0	0	0	0	0	0	0	0	0	0				0	1	0	0	0	0
45	1	41.4127	182	85	25.6612	1	20	0	0	0	0	0	1	0	0	0	0	0	0	1	0	0	0	0	0	0	0	0	0	0	1	0	0	1	0	0	0	0	0	0				0	1	0	0	1	0
281	0	41.4894	154	80	33.7325	1	25	0	1	0	0	0	1	0	0	0	0	0	0	2	1	1	0	0	0	0	0	0	0	0	1	0	0	3	0	0	1	0	1	0				0	2	1	1	1	0
311	1	41.6674	187	110	31.4564	1	30	0	1	0	0	0	0	0	0	0	0	0	0	1	1	0	0	0	1	0	0	0	0	0	0	0	0	2	0	0	1	0	1	0				0	2	0	0	0	0
31	1	41.6975	173	72	24.0569	1	30	0	0	0	0	0	0	0	0	0	0	0	0	0	0	0	0	0	0	0	0	0	0	0	0	0	0	0	0	0	1	0	1	1	3	12	144	0	0	1	0	0	0
277	0	41.7303	173	69	23.0546	1	40	0	0	0	0	0	0	0	0	0	0	0	0	0	0	0	0	0	0	0	0	0	0	0	0	0	0	0	0	0	0	0	0	0				0	0	0	1	0	0
251	0	41.7714	165	59	21.6713	1	50	0	0	0	0	0	0	0	0	0	0	0	0	0	0	0	0	0	0	0	0	0	0	0	0	0	0	0	0	0	1	1	1	1	7	3	84	0	0	1	0	0	0
70	0	41.8042	173	65	21.7181	1	24	0	0	0	0	0	0	0	0	0	0	0	0	0	0	0	0	0	0	0	0	0	0	0	0	0	0	0	0	0	0	0	1	1	2	12	96	0	0	0	0	0	0
342	0	41.87	175	62	20.2449	1	15	0	0	0	0	0	0	0	0	0	0	0	0	0	0	0	0	0	0	0	0	0	0	0	0	0	0	0	0	0	1	1	1	0				0	0	0	1	0	0
385	0	41.8891	170	64	22.1453	1	25	0	0	0	0	0	0	0	0	0	0	0	0	0	0	0	0	0	0	0	0	0	0	0	0	0	0	0	1	0	0	0	0	0				0	2	0	0	0	0
240	1	41.9247	176	79	25.5036	1	20	0	0	0	0	0	0	0	0	0	0	0	0	0	0	0	0	0	0	0	0	0	0	0	0	0	0	0	0	0	1	0	1	1	4	12	192	0	0	0	0	0	0
388	0	41.9274	153	53	22.6409	1	20	0	0	0	0	0	0	0	0	0	0	0	0	0	0	0	0	0	0	0	0	0	0	0	0	0	0	0	0	0	0	0	0	1	2	1	8.66	0	1	0	0	0	0
293	0	42.0068	173	62	20.7157	1	30	0	0	0	0	0	0	0	0	0	0	0	0	0	0	0	0	0	0	0	0	0	0	0	0	0	0	0	0	0	0	0	0	0				0	0	0	0	0	0
49	0	42.1054	174	59	19.4874	1	37.5	0	0	0	0	0	0	0	0	0	1	0	0	1	0	0	0	0	0	1	0	0	0	0	0	0	0	1	0	0	1	0	1	0				0	0	0	0	0	0
190	1	42.1766	180	105	32.4074	1	50	0	0	0	0	0	0	0	0	0	0	0	0	0	0	0	0	0	0	0	0	0	0	0	0	0	0	0	0	0	1	0	1	1	7	12	336	1	1	0	0	1	0
33	1	42.256	187	107	30.5985	1	36	0	0	0	0	0	0	0	0	0	0	0	0	0	0	0	0	0	0	0	0	0	0	0	0	0	0	0	0	0	1	0	1	1	2	12	96	0	1	0	1	1	0
290	0	42.2861	158	62	24.8358	1	12.5	0	0	0	0	0	0	0	0	0	0	0	0	0	0	0	0	0	0	0	0	0	0	0	0	0	0	0	0	0	0	0	0	0				0	0	0	0	0	0
106	1	42.4339	188	100	28.2933	1	20	0	0	0	0	0	0	0	0	0	0	0	0	0	0	0	0	0	0	0	0	0	0	0	0	0	0	0	0	0	1	0	1	0				0	0	0	0	0	0
317	0	42.4559	176	73	23.5666	1	28	0	0	0	0	0	0	0	0	0	0	0	0	0	0	0	0	0	0	0	0	0	0	0	0	0	0	0	0	0	1	1	1	1	7	12	336	0	1	0	0	1	0
292	0	42.4613	178	80	25.2493	1	21.6	0	0	0	0	0	0	0	0	0	0	0	0	0	0	0	0	0	0	0	0	0	0	0	1	0	0	1	0	0	1	0	1	1	7	12	336	0	1	0	0	0	0
247	0	42.5736	165	85	31.2213	1	15	0	1	0	0	0	0	0	0	0	1	0	0	2	0	0	0	0	0	0	0	0	0	0	0	0	0	0	0	0	0	0	0	0				0	0	0	0	0	0
422	0	42.6064	168	52	18.424	0	80	0	1	0	0	1	0	0	0	0	0	0	0	2	0	0	0	0	1	0	0	0	0	0	0	0	0	1	0	0	0	1	1	1				1	3	1	1	1	0
328	1	42.6968	185	108	31.5559	1	33.25	0	0	0	0	0	0	0	0	0	0	0	0	0	0	0	0	0	0	0	0	0	0	0	0	0	0	0	0	0	1	1	1	1	7	12	336	1	2	0	1	0	0
47	0	42.6995	168	87	30.8248	1	56.55	0	0	0	0	0	0	0	0	0	0	0	0	0	0	0	0	0	0	0	0	0	0	0	0	0	0	0	0	0	0	0	0	0				0	0	0	0	0	0
34	1	42.7324	190	100	27.7008	1	20	0	0	0	0	0	0	0	0	0	0	0	0	0	0	0	0	0	0	0	0	0	0	0	0	0	0	0	0	0	0	0	0	0				0	0	0	0	0	0
260	0	42.7379	168	88	31.1791	1	48	0	0	0	0	0	1	0	0	0	0	0	0	1	0	0	0	0	0	0	0	0	0	0	1	0	0	1	0	0	1	1	1	0				0	1	0	1	1	0
173	1	42.9952	165	70	25.7117	1	50	0	0	0	0	0	0	0	0	0	0	0	0	0	0	0	0	0	0	0	0	0	0	0	0	0	0	0	0	0	1	1	1	1	1	12	48	0	0	0	0	1	1
59	1	43.0089	193	105	28.1887	0	25	0	0	0	0	1	0	0	0	0	0	0	0	1	0	0	0	0	0	0	0	0	0	0	0	0	0	0	0	0	1	0	0	0				0	0	0	1	1	0
363	0	43.1951	169	80	28.0102	1	54	0	0	0	0	0	0	0	0	0	1	0	0	1	0	0	0	0	0	1	0	0	0	0	0	0	0	1	0	0	1	0	1	0				0	1	1	1	0	0
424	0	43.2936	169	59	20.6575	1	8	1	0	0	0	0	0	0	0	0	0	0	0	1	0	0	0	0	0	0	0	0	0	0	0	0	0	0	0	0	1	0	1	0				0	0	0	0	0	0
244	0	43.3155	164	50	18.5901	1	30	0	0	0	0	0	0	0	0	0	0	0	0	0	0	0	0	0	0	0	0	0	0	0	0	0	0	0	0	0	1	1	1	1	7	12	336	0	0	0	0	0	0
432	1	43.332	171	71	24.281	1	20	0	0	0	0	0	0	0	0	0	0	0	0	0	0	0	0	0	0	0	0	0	0	0	0	0	0	0	0	0	1	0	1	1	6	12	288	0	1	0	1	1	1
157	1	43.4415	175	100	32.6531	1	37.5	0	1	0	0	0	0	0	0	0	0	0	0	1	1	0	0	0	0	0	0	0	0	0	0	0	0	1	0	0	1	1	1	1	7	1	28	0	2	0	1	0	0
266	1	43.5236	180	125	38.5802	1	50	0	1	0	0	0	0	0	0	0	0	0	0	1	0	0	0	0	0	0	0	0	0	0	0	0	0	0	0	0	1	1	1	1	7	12	336	0	1	0	0	0	0
84	0	43.6605	163	90	33.8741	1	40	0	1	0	0	0	0	0	0	0	0	0	0	1	1	0	0	1	0	0	0	0	0	0	0	0	0	2	0	1	1	1	1	1	2	12	96	1	1	1	1	0	0
85	1	43.6824	167	60	21.5139	1	40	0	0	0	1	0	0	0	0	0	0	1	0	2	0	0	0	0	0	0	0	0	0	0	1	1	0	2	0	0	1	0	1	1	1	12	48	0	0	1	1	1	0
410	1	43.7536	172	68	22.9854	1	30	0	0	0	0	0	0	0	0	0	0	0	0	0	0	0	0	0	0	0	0	0	0	0	0	0	0	0	0	0	0	0	0	0				0	0	0	0	0	0
395	1	43.7563	175	100	32.6531	0	17	0	0	0	0	0	0	0	0	0	0	0	0	0	0	0	0	0	0	0	0	0	0	0	0	0	0	0	0	0	0	0	0	0				0	0	0	0	0	0
250	0	43.781	153	80	34.1749	1	18.75	0	1	0	0	0	1	0	0	0	0	0	0	2	0	1	0	0	0	0	0	0	0	0	1	0	0	2	0	0	1	1	0	1	4	12	192	1	3	1	1	1	0
104	1	43.8275	191	94	25.7668	1	70	0	0	0	0	0	0	0	0	0	0	0	0	0	0	0	0	0	0	0	0	0	0	0	0	0	0	0	0	0	0	1	1	1	7	12	336	0	1	0	0	0	0
259	0	43.8467	172	70	23.6614	1	23	0	0	0	0	0	0	0	0	0	0	0	0	0	0	0	0	0	0	0	0	0	0	0	0	0	0	0	0	0	1	0	0	0				0	1	0	0	0	0
30	0	43.9781	167	74	26.5338	1	20	0	0	0	0	0	0	0	0	0	0	0	0	0	0	0	0	0	0	0	0	0	0	0	0	0	0	0	0	0	0	0	1	0				0	1	0	0	0	0
62	1	44.1068	181	97	29.6084	1	20	0	1	0	0	1	0	0	0	0	0	0	0	2	1	0	0	0	1	0	0	0	0	0	0	0	0	2	0	0	0	0	0	0				0	0	0	0	0	0
39	0	44.1889	178	77	24.3025	1	17.25	0	0	0	0	1	0	0	0	0	0	0	0	1	0	0	0	0	1	0	0	0	0	0	0	0	0	1	0	0	0	0	0	0				0	0	0	0	0	0
380	0	44.2683	170	78	26.9896	1	25	0	1	0	0	0	0	0	0	0	0	0	0	1	0	1	1	0	0	0	0	0	0	0	0	0	0	2	0	0	1	0	1	0				0	1	1	1	0	0
310	0	44.3368	178	108	34.0866	1	27	0	0	0	0	0	0	0	0	0	0	0	0	0	0	0	0	0	0	0	0	0	0	0	0	0	0	0	0	0	1	1	1	0				0	2	0	0	0	0
309	1	44.4107	171	98	33.5146	0	37.5	0	0	0	0	0	0	0	0	0	0	0	0	0	0	0	0	0	1	0	0	1	0	0	1	0	0	3	0	0	0	0	0	0				1	1	0	0	0	0
344	1	44.4709	178	100	31.5617	1	36	0	0	0	0	0	0	0	0	0	0	0	0	0	0	0	0	0	0	0	0	0	0	0	0	0	0	0	0	0	1	1	1	1	3	12	144	0	1	0	0	0	0
238	1	44.6461	189	106	29.6744	1	23	0	0	0	0	0	0	0	0	0	0	0	0	0	0	0	0	0	0	0	0	0	0	0	0	0	0	0	0	0	1	0	1	1	2	12	96	0	1	0	0	0	0
37	1	44.6653	186	94	27.1708	1	39	0	0	0	0	0	0	0	0	0	0	0	0	0	0	0	0	0	0	0	0	0	0	0	0	0	0	0	0	0	0	0	0	0				0	0	0	0	1	0
102	0	44.668	165	53	19.4674	1	28	0	0	0	0	0	0	0	0	0	0	0	0	0	0	0	0	0	0	0	0	0	0	0	0	0	0	0	0	0	0	0	0	0				0	0	0	0	0	0
196	0	44.6982	174	65	21.4692	1	30	0	0	0	1	0	0	0	0	0	0	0	0	1	0	0	0	0	0	0	0	0	0	0	0	0	0	0	0	0	1	0	1	0				0	1	0	0	0	0
268	0	44.731	169	77	26.9598	1	50	0	0	0	0	0	0	0	0	0	0	0	0	0	0	0	0	0	0	0	0	0	0	0	0	0	0	0	0	0	1	0	1	0				0	1	0	1	1	0
151	1	44.8789	177	84	26.8122	1	28	0	0	0	0	0	0	0	0	0	0	0	0	0	0	0	0	0	0	0	0	0	0	0	0	0	0	0	0	0	0	0	0	0				0	0	0	0	0	0
269	1	44.8816	180	92	28.3951	1	66	0	0	0	0	0	0	0	0	0	0	0	0	0	0	0	0	0	0	0	0	0	0	0	0	0	0	0	0	0	1	1	1	0				0	1	1	1	1	0
217	0	45.2101	164	70	26.0262	1	25	0	0	0	0	0	0	0	0	0	0	0	0	0	0	0	0	0	0	0	0	0	0	0	0	0	0	0	0	0	0	0	0	0				0	0	0	0	0	0
198	1	45.2621	180	80	24.6914	1	45	0	0	0	0	0	0	0	0	0	0	0	0	0	0	0	0	0	0	0	0	0	0	0	0	0	0	0	0	0	1	0	1	1	2	12	96	0	0	0	0	0	0
379	0	45.5277	165	75	27.5482	0	29.75	0	0	0	0	0	0	0	0	0	0	0	0	0	0	0	0	0	0	0	0	0	0	0	0	0	0	0	0	0	0	0	0	0				0	1	0	0	0	0
19	0	45.629	156	51	20.9566	1	20	0	0	0	0	0	0	0	0	0	0	0	0	0	0	0	0	0	0	0	0	0	0	0	0	0	0	0	0	0	0	0	0	0				0	0	0	0	0	0
276	0	45.8371	167	101	36.215	1	27	0	0	0	0	0	0	0	0	0	0	0	1	1	0	0	0	0	0	0	0	1	0	0	0	0	0	1	0	0	1	0	1	0				1	2	1	1	0	0
118	1	45.8453	179	120	37.452	0	54	0	0	0	0	0	1	0	0	0	0	0	0	1	0	0	0	0	0	0	0	0	0	0	0	0	1	1	0	0	0	0	0	0				0	0	0	0	0	0
236	0	45.9576	158	45	18.026	1	18.75	0	0	0	0	0	0	0	0	0	0	0	0	0	0	0	0	0	0	0	0	0	0	0	0	0	0	0	0	0	1	0	1	0				0	1	0	1	1	0
120	1	46.0726	179	90	28.089	1	60	0	0	0	0	0	0	0	0	0	0	0	0	0	0	0	0	0	0	0	0	0	0	0	0	0	0	0	0	0	1	1	1	1	5	12	240	0	1	0	0	0	0
2	1	46.078	187	94	26.881	1	50	0	0	0	0	0	0	0	0	0	0	0	0	0	0	0	0	0	0	0	0	0	0	0	0	0	0	0	0	0	0	0	1	1	2	12	96	0	0	0	0	1	0
12	1	46.1739	185	89	26.0044	1	37.5	0	0	0	1	0	0	0	0	0	0	0	0	1	0	0	0	0	0	0	0	0	0	0	0	0	0	0	0	0	0	0	0	0				0	0	0	0	0	0
121	0	46.2478	172	56	18.9292	1	25	0	0	0	0	0	0	0	0	0	1	0	0	1	0	0	0	0	0	0	0	0	0	0	0	0	1	1	0	0	1	0	1	0				0	1	0	1	0	0
105	0	46.4038	173	72	24.0569	1	28	0	0	0	0	0	0	0	0	0	0	0	1	1	0	0	0	0	0	0	0	0	0	0	0	0	1	1	0	0	0	0	0	0				0	0	0	0	1	0
426	1	46.412	195	105	27.6134	1	45	0	0	0	0	0	0	0	0	0	0	0	0	0	0	0	0	0	0	0	0	0	0	0	0	0	0	0	0	0	0	0	0	0				0	0	0	0	0	0
36	0	46.423	165	60	22.0386	1	28	0	0	0	0	0	0	0	0	0	0	0	0	0	0	0	0	0	0	0	0	0	0	0	0	0	0	0	0	0	1	1	0	0				0	0	0	0	0	0
93	0	46.4339	176	71	22.921	1	31	0	0	0	0	0	0	0	0	0	0	0	0	0	0	0	0	0	0	1	0	0	0	0	0	0	0	1	0	0	0	0	1	0				0	1	0	0	0	0
284	1	46.5106	190	82	22.7147	1	26	0	0	0	0	0	0	0	0	0	0	0	0	0	0	0	0	0	0	0	0	0	0	0	0	0	0	0	0	0	1	0	0	0				0	1	0	1	1	0
435	1	46.5161	185	87	25.42	1	22	0	0	0	0	0	0	0	0	0	0	0	0	0	0	0	0	0	0	0	0	0	0	0	0	0	0	0	0	0	0	0	0	0				0	0	0	0	0	0
394	1	46.5818	175	85	27.7551	1	22.5	0	0	0	0	0	0	0	0	0	0	1	0	1	0	0	0	0	0	0	0	0	0	0	0	0	0	0	0	0	0	0	0	0				0	0	0	0	0	0
429	1	46.6146	171	91	31.1207	1	26	0	0	0	0	0	0	0	0	0	0	0	0	0	0	0	0	0	0	0	0	0	0	0	0	0	0	0	0	0	0	0	0	0				0	0	0	0	0	0
243	0	46.6721	168	58	20.5499	1	33.75	0	0	0	0	0	0	0	0	0	0	0	0	0	0	0	0	0	0	0	0	0	0	0	0	0	0	0	0	0	1	1	1	1	7	3	84	0	3	0	1	1	0
308	0	46.7187	162	55	20.9572	1	25	0	0	0	0	0	0	0	0	0	0	0	0	0	0	0	0	0	0	0	0	0	0	0	0	0	0	0	0	0	1	1	1	1	7	12	336	0	1	0	1	0	0
313	0	46.7461	158	68	27.2392	1	32	0	0	0	0	0	0	0	0	0	0	0	0	0	0	0	0	0	0	0	0	0	0	0	0	0	0	0	0	0	1	1	1	1	7	12	336	0	2	0	0	0	0
193	0	46.82	165	64	23.5078	1	48	0	1	0	0	0	0	0	0	0	0	0	0	1	0	1	0	0	0	0	0	0	0	0	0	0	0	1	0	0	1	0	1	1	3.5	12	168	0	2	0	1	0	0
199	1	46.8309	180	105	32.4074	1	60	0	0	0	0	0	0	0	0	0	0	0	0	0	0	0	0	0	0	0	0	0	0	0	0	0	0	0		0	1	1	1	0				1	0	0	0	0	0
111	0	46.8364	170	78	26.9896	1	30	0	1	0	0	0	0	0	0	0	0	0	0	1	1	1	0	0	0	0	0	0	0	0	0	0	0	2	0	0	1	1	1	1	1	12	48	0	1	0	1	0	0
134	0	47.2307	165	65	23.8751	1	27	0	0	0	0	0	0	0	0	0	0	0	0	0	0	0	0	0	0	0	0	0	0	0	0	0	0	0	0	0	0	0	0	0				0	0	1	1	1	1
333	1	47.3566	188	96	27.1616	1	30	0	0	0	0	0	0	0	0	0	0	0	0	0	0	0	0	0	0	0	0	0	0	0	0	0	0	0	0	0	0	0	0	0				0	0	0	1	0	0
351	0	47.3895	175	75	24.4898	1	67.5	0	0	0	0	0	0	0	0	0	0	0	1	1	0	0	0	0	0	0	0	0	0	0	0	0	0	0	0	0	1	0	1	0				0	1	0	1	0	0
239	0	47.5291	171	105	35.9085	1	30	0	0	0	0	0	1	0	0	0	0	0	0	1	0	0	0	0	0	0	0	0	0	0	1	0	0	1	0	0	1	0	1	0				0	0	1	0	0	0
320	1	47.5647	186	67	19.3664	1	60	0	0	0	1	0	0	0	0	0	0	0	0	1	0	0	0	0	0	0	0	0	0	0	0	1	0	1	0	0	0	0	0	0				0	0	0	0	1	1
201	0	47.5893	170	65	22.4913	1	30	0	0	0	0	0	0	0	0	0	0	0	0	0	0	0	0	0	0	0	0	0	0	0	0	0	0	0	0	0	0	0	0	0				0	1	0	0	0	0
252	0	47.6441	167	90	32.2708	1	22.5	0	0	0	0	0	0	0	0	0	0	0	0	0	0	0	0	0	0	0	0	0	0	0	0	0	0	0	0	0	0	0	0	0				0	1	0	0	0	0
349	0	47.7043	165	88	32.3232	1	40	0	1	0	0	0	0	0	0	0	0	0	0	1	1	0	1	0	0	0	0	0	0	0	0	0	0	2	0	0	1	0	1	0				1	2	1	1	1	0
294	1	47.7892	170	75	25.9516	1	25	0	0	0	0	0	0	0	0	0	0	0	0	0	0	0	0	0	1	0	0	0	0	0	0	0	0	1	0	0	1	1	0	0				0	0	0	0	0	1
403	1	47.8357	176	92	29.7004	1	45	0	0	0	0	0	0	0	0	0	0	0	0	0	0	0	0	0	0	0	0	0	0	0	0	0	0	0	0	0	0	0	0	1	7	12	336	0	1	1	0	0	1
26	0	47.8522	164	63	23.4236	1	30	0	0	0	0	0	0	0	0	0	0	0	0	0	0	0	0	0	0	0	0	0	0	0	0	0	0	0	0	0	0	0	0	0				0	0	0	0	0	0
65	0	47.9562	172	70	23.6614	1	25	0	0	0	0	0	0	0	0	0	0	0	0	0	0	0	0	0	0	0	0	0	0	0	0	0	0	0	1	0	1	0	1	1	5	5	100	0	1	0	1	1	1
72	1	48.1533	173	83	27.7323	1	25	0	0	0	0	0	0	0	0	0	0	0	0	0	0	0	0	0	0	0	0	0	0	0	0	0	0	0	0	0	1	1	1	1	7	12	336	0	0	1	1	0	0
391	0	48.1561	155	70	29.1363	1	15	0	0	0	0	0	0	0	0	0	0	0	0	0	0	0	0	0	0	0	0	0	0	0	0	0	0	0	0	0	0	0	0	0				0	0	0	0	0	0
441	1	48.2136	178	77	24.3025	1	27	0	0	0	0	0	0	0	0	0	0	0	0	0	0	0	0	0	0	0	0	0	0	0	0	0	0	0	0	0	0	0	0	0				0	1	0	0	1	0
372	1	48.2875	180	95	29.321	1	37.5	0	0	0	0	0	0	0	0	0	0	0	0	0	0	0	0	0	0	0	0	0	0	0	0	0	0	0	0	0	1	1	1	1	4	12	192	0	2	1	0	1	0
192	0	48.3422	163	60	22.5827	0	26.25	0	0	0	0	0	0	0	0	0	0	1	0	1	0	0	0	0	0	0	0	0	0	0	0	0	0	0	0	0	1	0	1	1	4	12	192	0	2	1	1	0	0
97	1	48.4791	180	82	25.3086	1	25	0	0	0	0	0	0	0	0	0	0	0	0	0	0	0	0	0	0	0	0	0	0	0	0	0	0	0	0	0	1	0	1	0				0	1	0	0	0	0
242	0	48.4928	172	72	24.3375	1	22.5	0	0	0	0	0	0	0	0	0	0	0	0	0	0	0	0	0	0	0	0	0	0	0	0	0	0	0	0	0	1	1	0	0				0	1	0	1	0	0
365	1	48.5394	178	96	30.2992	1	48	0	1	0	0	0	0	0	0	0	0	0	0	1	1	0	1	0	0	0	0	0	0	0	0	0	0	2	0	0	1	1	1	1	7	12	336	0	1	0	0	0	0
191	1	48.627	174	76	25.1024	1	30	0	1	0	0	0	0	0	0	0	0	0	0	1	1	0	0	1	0	0	0	0	0	0	0	0	0	2	0	0	1	0	1	1	7	1	28	0	0	0	0	0	0
359	0	48.6407	160	54	21.0938	1	60	0	0	0	0	0	0	0	0	0	0	0	1	1	0	0	0	0	0	0	0	1	0	0	0	0	0	1	0	0	1	1	1	1	4	12	192	0	2	0	1	0	0
71	0	48.6516	170	65	22.4913	1	24	0	0	0	0	0	0	0	0	0	0	0	0	0	0	0	0	0	0	0	0	0	0	0	0	0	0	0	0	0	0	0	1	1	1	12	48	0	0	0	0	0	0
57	1	48.6762	175	72	23.5102	1	35	0	1	0	0	0	0	0	0	0	0	0	0	1	0	0	0	0	0	0	0	0	0	0	0	0	0	0	0	0	0	1	1	1	2	12	96	0	1	0	0	0	0
296	1	48.7556	168	86	30.4705	1	18	0	0	0	0	0	0	0	0	0	0	0	0	0	0	0	0	0	0	0	0	0	0	0	0	0	0	0	0	0	1	1	1	1	7	1	28	0	1	0	0	1	0
350	1	48.7556	185	95	27.7575	1	60	0	0	0	0	0	1	0	0	0	0	0	0	1	0	0	0	0	0	0	0	0	0	0	1	0	0	1	0	0	1	1	1	1	7	12	336	0	2	0	0	1	0
218	1	48.783	192	91	24.6853	1	60	0	1	0	0	0	0	0	0	0	0	0	0	1	0	0	0	0	0	0	0	0	0	0	0	0	0	0	0	0	1	1	1	1	2	12	96	1	1	1	1	0	0
185	0	48.8022	168	91	32.2421	1	30	0	0	0	0	0	0	0	0	0	0	0	0	0	0	0	0	0	0	0	0	0	0	0	0	0	0	0	0	0	1	0	1	1	1	12	48	0	0	0	0	0	0
264	0	48.846	164	60	22.3081	1	25	0	0	0	0	0	0	0	0	0	0	0	0	0	0	0	0	0	0	0	0	0	0	0	0	0	0	0	0	0	1	1	1	0				0	1	1	1	0	0
255	1	48.8515	176	85	27.4406	1	48	1	1	0	0	0	0	0	0	0	0	0	0	2	0	0	0	1	0	0	0	0	0	0	0	0	0	1	0	0	0	0	0	0				0	0	0	0	1	1
53	1	48.8953	186	78	22.546	1	30	0	1	0	0	0	0	0	0	0	0	0	0	1	0	0	1	0	0	0	0	0	0	0	0	0	0	1	0	0	0	0	0	0				0	0	0	0	0	0
270	0	48.9884	175	67	21.8776	1	33	0	0	0	1	0	0	0	0	0	0	0	0	1	0	0	0	0	0	0	0	0	0	0	0	0	0	0	0	0	1	1	1	1	2	12	96	0	1	0	0	1	1
302	1	49.0048	188	75	21.22	1	80	0	0	0	0	0	0	0	0	0	0	0	0	0	0	0	0	0	0	0	0	0	0	0	0	0	0	0	0	0	1	1	1	0				0	0	0	0	1	0
44	0	49.0294	170	100	34.6021	1	52.5	0	1	0	0	1	0	0	0	0	0	0	0	2	0	0	1	0	1	0	0	0	0	0	0	0	0	2	0	0	1	1	1	1	6	12	288	1	1	1	1	0	0
182	0	49.0924	157	62	25.1532	0	21	0	0	0	0	0	0	0	0	0	0	0	0	0	0	0	0	0	0	0	0	0	0	0	0	0	0	0	0	0	0	0	1	1				0	0	0	0	0	0
164	0	49.2238	164	70	26.0262	1	30	0	0	0	1	0	0	0	0	0	0	0	0	1	0	0	0	0	0	0	0	1	0	0	0	0	0	1	0	0	1	1	1	1	1	12	48	0	1	1	1	1	0
318	1	49.2594	182	82	24.7555	1	7.5	0	1	0	0	0	0	0	0	0	0	0	0	1	1	0	0	0	0	0	0	0	0	0	0	0	0	1	0	0	0	0	0	0				0	0	0	0	0	0
112	1	49.306	195	103	27.0874	1	40	0	0	0	0	1	0	0	0	0	0	0	0	1	0	0	0	0	1	0	0	0	0	0	0	0	0	1	1	0	1	0	1	0				0	1	0	1	0	0
16	0	49.3908	165	69	25.3444	1	25	0	0	0	0	1	0	0	0	0	0	0	0	1	0	0	0	0	0	0	0	0	0	0	0	0	0	0	0	0	0	0	0	0				0	0	0	0	0	0
21	1	49.4949	175	110	35.9184	1	38	0	0	0	0	0	0	0	0	0	0	0	0	0	0	0	0	0	0	0	0	0	0	0	0	0	0	0	0	0	1	1	1	0				1	0	0	0	1	0
11	1	49.6427	187	102	29.1687	1	61.25	0	0	1	0	0	0	0	0	0	0	0	0	1	0	0	0	0	0	0	0	0	0	1	0	0	0	1	0	0	0	0	1	1	2	12	96	0	0	0	0	1	0
362	0	49.6728	165	60	22.0386	1	20	0	0	0	0	0	0	0	0	0	0	0	0	0	0	0	0	0	0	0	0	0	0	0	0	0	0	0	0	0	0	0	0	0				0	1	1	1	0	0
428	1	49.6728	177	93	29.685	1	34	1	0	0	0	0	0	0	0	0	0	0	0	1	0	0	0	0	0	0	0	0	0	0	0	0	0	0	0	0	0	1	1	1	7	3	84	0	0	0	0	1	1
207	1	49.7467	168	102	36.1395	0	50	0	1	0	0	1	0	0	0	0	0	0	0	2	0	1	0	1	1	0	0	0	0	0	0	0	0	3	0	0	1							1	0	1	0	1	1
165	1	49.8207	170	70	24.2215	1	35	0	0	0	0	0	0	0	0	0	0	0	0	0	0	0	0	0	0	0	0	0	0	0	0	0	0	0		0	1	1	1	1	3	12	144	0	0	0	0	1	0
412	1	49.8535	168	88	31.1791	1	66	0	0	0	0	0	0	0	0	0	0	0	0	0	0	0	0	0	0	0	0	0	0	0	0	0	0	0	0	0	0	0	0	0				0	0	0	1	0	0
80	1	49.9192	189	93	26.0351	1	37.5	0	0	0	0	0	0	0	0	0	0	0	0	0	0	0	0	0	0	0	0	0	0	0	0	0	0	0	0	0	0	0	0	0				0	0	0	0	1	0
197	1	49.9411	182	82	24.7555	1	26	0	0	0	0	0	0	0	0	0	0	0	0	0	0	0	0	0	0	0	0	0	0	0	0	0	0	0	0	0	0	0	0	0				0	0	0	0	0	0
288	0	49.9411	160	52	20.3125	1	22.5	0	0	0	0	0	0	0	0	0	0	0	0	0	0	0	0	0	0	0	0	0	0	0	0	0	0	0	0	0	1	0	1	1	7	12	336	0	0	0	1	0	0
160	0	49.9603	155	55	22.8928	1	30	0	0	0	0	0	0	0	0	0	0	0	0	0	0	0	0	0	0	0	0	0	0	0	0	0	0	0	0	0	1	0	1	1	3	12	144	0	0	0	0	0	0
414	1	49.974	186	70	20.2336	1	30	0	0	0	0	0	0	0	0	0	0	0	1	1	0	0	0	0	0	0	0	0	0	0	0	0	0	0	0	0	0	0	0	0				0	0	0	0	0	0
98	0	50.0041	172	75	25.3515	1	40	0	1	0	0	1	0	0	0	0	0	0	0	2	0	0	0	0	0	0	0	0	0	0	0	0	0	0	0	0	0	1	0	0				0	1	0	1	0	0
285	1	50.0452	196	123	32.0179	1	30	0	1	0	0	0	0	0	0	0	0	0	1	2	1	0	1	0	0	0	0	0	0	0	1	0	0	3	0	0	1	1	1	1	7	12	336	0	2	1	1	0	0
430	1	50.0726	182	84	25.3593	1	62	0	0	0	0	0	0	0	0	0	0	0	0	0	0	0	0	0	0	0	0	0	0	0	0	0	0	0	0	1	1	1	1	1	7	12	336	0	1	0	0	1	0
329	0	50.0753	168	60	21.2585	1	32	0	0	0	0	0	0	0	0	0	1	0	0	1	0	0	0	0	0	1	0	0	0	0	0	0	0	1	0	0	1	0	1	1	7	12	336	0	0	0	1	0	0
216	0	50.1848	174	74	24.4418	0	37.5	0	0	0	0	0	0	0	0	0	0	0	0	0	0	0	0	0	0	0	0	0	0	0	0	0	0	0	0	0	1	1	1	1	7	12	336	0	1	1	0	1	0
6	0	50.2122	152	65	28.1337	1	22.5	0	0	0	0	0	0	0	0	0	0	0	0	0	0	0	0	0	0	0	0	0	0	0	0	0	0	0	0	0	0	0	1	0				0	1	0	0	0	0
17	1	50.2505	190	108	29.9169	1	21.25	0	0	1	0	0	0	0	1	0	0	0	0	2	0	1	0	0	1	0	0	0	0	1	0	0	0	3	0	0	0	0	0	0				0	0	0	1	0	0
122	0	50.3272	168	72	25.5102	1	30	0	0	0	0	0	0	0	0	0	0	0	0	0	0	0	0	0	0	0	0	0	0	0	0	0	0	0	0	0	0	0	1	0				0	1	0	1	0	0
40	1	50.4093	197	113	29.117	0	87.5	0	0	0	0	0	0	0	0	0	0	0	0	0	0	0	0	0	0	0	0	0	0	0	0	0	0	0	0	0	0	0	0	0				0	0	0	0	0	0
227	0	50.4148	167	70	25.0995	1	35	0	0	0	0	0	0	0	0	0	0	0	0	0	0	0	0	0	0	0	0	0	0	0	0	0	0	0	0	0	0	0	0	0				0	0	0	0	0	0
181	0	50.4367	160	68	26.5625	0	20	0	0	0	0	0	0	0	0	0	0	0	0	0	0	0	0	0	0	0	0	0	0	0	0	0	0	1	0	0	1	1	1	1	7	12	365	0	0	0	1	1	1
5	1	50.5051	177	94	30.0041	1	66	0	1	0	0	1	0	0	0	0	0	0	0	2	0	0	1	0	1	0	0	0	0	0	0	0	0	2	0	0	0	1	1	1	3	10	120	0	1	0	1	0	0
166	1	50.5654	165	75	27.5482	1	30	0	0	0	0	0	0	0	0	0	0	0	0	0	0	0	0	0	0	0	0	0	0	0	0	0	0	0			0	0	1	1	3	12	144	0	0	0	0	0	0
304	0	50.5763	164	74	27.5134	1	30	0	1	0	0	0	0	0	0	0	0	0	0	1	1	0	1	1	0	0	0	0	0	0	0	0	0	3	0	0	0	0	0	0				0	1	0	0	1	0
95	0	50.59	168	76	26.9274	1	45	0	0	0	0	1	0	0	0	0	0	0	0	1	0	0	0	0	0	0	0	0	0	0	0	0	0	0	0	0	0	1	1	1	2	12	96	0	1	0	1	0	0
127	1	50.6256	168	90	31.8878	1	60	0	1	0	0	1	1	0	0	0	0	0	0	4	0	0	0	0	1	0	0	0	0	0	2	0	2	5	0	0	1	1	1	1	7	12	365	1	3	1	1	1	1
203	1	50.6256	182	73	22.0384		70	0	0	0	0	0	0	0	0	0	0	0	0	0	0	0	0	0	0	0	0	0	0	0	0	0	0	0	0	0	1	0	1	1	0.25	12	12	0	1	0	0	1	0
169	0	50.642	162	72	27.4348	1	15	0	0	0	0	0	0	0	0	0	0	0	0	0	0	0	0	0	0	0	0	0	0	0	0	0	0	0	0	0	0	0	1	1	3	12	144	0	2	0	1	0	0
152	0	50.7379	167	74	26.5338	1	30	0	0	0	0	0	0	0	0	0	0	0	0	0	0	0	0	0	0	0	0	0	0	0	0	0	0	0		0	0	0	0	0				0	0	0	0	0	0
273	0	50.7926	162	59	22.4813	1	13.5	0	0	0	0	0	0	0	0	0	0	0	0	0	0	0	0	0	0	0	0	0	0	0	0	0	0	0	0	0	0	0	0	0				1	1	0	1	1	0
433	1	50.8556	176	86	27.7634	1	25	0	0	0	0	0	0	0	0	0	0	0	0	0	0	0	0	0	0	0	0	0	0	0	0	0	0	0	0	0	0	0	0	0				0	0	0	0	0	0
162	0	50.9131	158	77	30.8444	1	33	0	1	0	0	1	0	0	0	0	0	0	0	2	1	0	0	0	0	0	0	0	0	0	0	0	0	1	0	0	1	0	1	1	7	6	168	0	0	0	0	0	0
205	0	50.9185	167	58	20.7967	1	30	0	0	0	0	1	0	0	0	0	0	0	0	1	0	0	0	0	0	0	0	0	0	0	0	0	0	0	0	0	0	0	0	0				0	0	0	0	0	0
20	0	50.9706	167	94	33.705	1	30	0	0	0	0	0	0	0	0	0	0	0	0	0	0	0	0	0	0	0	0	0	0	0	0	0	0	0	0	0	0	0	1	1	2	12	96	0	0	0	0	1	0
125	0	50.9897	176	76	24.5351	1	34	0	0	0	0	0	0	0	0	0	0	0	0	0	0	0	0	0	0	0	0	0	0	0	0	0	0	0	0	0	0	0	0	0				0	0	0	0	0	0
400	1	51.0445	170	72	24.9135	1	50	0	0	0	0	0	0	0	0	0	0	0	0	0	0	0	0	0	0	0	0	0	0	0	0	0	0	0	0	1	0	0	0	0				0	0	1	0	0	0
374	0	51.0582	167	67	24.0238	1	25	0	0	0	0	0	0	0	0	0	0	0	0	0	0	0	0	0	0	0	0	0	0	0	0	0	0	0	0	0	1	0	1	1	2	12	96	0	0	0	0	0	1
393	1	51.1376	169	55	19.257	1	25	0	0	0	0	0	0	0	0	0	0	0	0	0	0	0	0	0	0	0	0	0	0	0	0	0	0	0	0	0	0	0	0	0				0	0	0	0	0	0
29	1	51.1786	177	88	28.089	1	45	0	0	0	0	0	0	0	0	0	0	0	0	0	0	0	0	0	0	0	0	0	0	0	0	0	0	0	0	0	1	0	1	1	1	2	8	0	0	0	1	1	0
139	0	51.2088	158	56	22.4323	1	20	0	0	0	0	0	0	0	0	0	0	0	0	0	0	0	0	0	0	0	0	0	0	0	0	0	0	0	0	0	0	0	0	0				0	0	0	1	1	1
420	1	51.3949	191	115	31.5233	1	45	0	0	0	0	0	0	0	0	0	0	0	0	0	0	0	0	0	0	0	0	0	0	0	0	0	0	0	0	0	1	1	1	1				0	2	1	1	0	0
291	0	51.4004	162	78	29.7211	1	30	0	0	0	0	0	0	0	0	0	0	0	0	0	0	0	0	0	0	0	0	0	0	0	0	0	0	0	0	0	1	1	1	1	3	12	144	0	1	0	0	0	0
231	1	51.5154	187	95	27.1669	1	35	0	1	0	0	0	0	0	0	0	0	0	0	0	0	1	0	1	0	0	0	0	0	0	0	0	0	2	0	0	1	0	1	0				0	0	0	0	1	0
27	1	51.5674	184	90	26.5832	0	31	0	0	0	0	0	0	0	0	0	0	0	0	0	0	0	0	0	0	0	0	0	0	0	0	0	0	0	0	0	0	0	0	0				0	0	0	0	0	0
167	1	51.7125	184	110	32.4905	1	36	0	0	0	0	0	0	0	0	0	1	0	0	1	0	0	0	0	0	1	0	0	0	0	0	0	0	1	0	0	0	0	0	0				0	0	0	1	0	0
366	1	51.7207	179	98	30.5858	1	35	0	0	0	0	0	0	0	0	0	0	0	0	0	0	0	0	0	0	0	0	0	0	0	0	0	0	0	0	0	0	0	0	0				0	0	0	0	0	0
129	1	51.7974	182	103	31.0953	1	52.5	0	0	0	0	0	0	0	0	0	0	0	0	0	0	0	0	0	0	0	0	0	0	0	0	0	0	0	0	0	1	0	1	1				0	0	0	0	0	0
183	0	51.8056	170	95	32.872	0	24	0	0	0	0	0	0	0	0	0	1	0	0	1	0	0	0	0	0	1	0	0	0	0	0	0	0	1	0	0	0	0	0	0				0	0	0	0	0	0
299	0	51.896	160	90	35.1562	1	18.75	1	1	0	0	0	0	0	0	0	0	0	1	3	0	0	0	1	0	0	0	0	0	0	1	0	0	2	1	0	1	1	0	0				1	2	1	1	0	0
114	1	51.9261	182	100	30.1896	1	24	0	1	0	0	0	0	0	0	0	0	0	0	1	1	0	1	0	0	0	0	0	0	0	0	0	0	2	0	0	1	0	0	1	1	12	48	0	1	0	1	0	0
336	0	51.948	165	66	24.2424	1	20	1	1	0	0	0	0	0	0	0	0	0	0	2	0	0	1	1	0	0	0	0	0	0	0	0	0	2	0	0	1	0	1	1				0	1	0	1	0	0
195	1	51.9699	176	110	35.5114		36	0	0	0	0	1	0	0	0	0	0	0	0	1	0	0	0	0	0	0	0	0	0	0	0	0	0	0	0	0	0	0	0	0				0	0	0	1	0	0
163	1	51.9754	173	103	34.4148	1	30	0	0	1	0	1	0	0	0	0	0	0	0	2	0	0	0	0	1	0	0	0	0	1	0	0	0	2	0	0	1	0	1	1	7	12	365	0	0	0	0	0	1
358	0	52.0082	170	77	26.6436	1	25	0	1	0	0	0	0	0	0	0	0	0	0	1	0	1	1	0	0	0	0	0	0	0	0	0	0	2	0	0	0	0	0	0				0	1	0	1	0	0
408	0	52.0164	163	93	35.0032	1	75	0	0	0	0	0	0	0	0	0	0	0	0	0	0	0	0	0	0	0	0	0	0	0	0	0	0	0	0	0	1	1	1	1				0	2	0	1	0	0
174	0	52.0356	162	54	20.5761	1	35	0	0	0	0	0	0	0	0	0	0	0	0	0	0	0	0	0	0	0	0	0	0	0	0	0	0	0	0	0	1	0	1	1	2	5	40	0	0	0	0	1	0
301	0	52.0986	161	48	18.5178	1	23	0	0	0	0	0	0	0	0	0	0	0	0	0	0	0	0	0	0	0	0	0	0	0	0	0	0	0	0	0	0	0	0	0				0	0	0	0	0	0
262	0	52.1013	169	75	26.2596	1	20	0	0	0	0	0	0	0	0	0	0	0	0	0	0	0	0	0	0	0	0	0	0	0	0	0	0	0	0	0	0	1	1	1	7	12	336	0	0	0	0	1	0
28	0	52.1287	175	70	22.8571	1	18.75	0	0	0	0	0	0	0	0	0	0	0	0	0	0	0	0	0	0	0	0	0	0	0	0	0	0	0	0	0	1	0	1	1	1	12	48	0	0	0	0	0	0
340	0	52.1834	163	84	31.6158	1	25	0	1	0	0	0	0	0	0	0	1	0	0	2	1	0	0	0	0	1	0	0	0	0	0	0	0	2	0	0	0	0	0	0				0	2	0	1	1	0
233	0	52.2081	165	67	24.6097	1	30	0	0	0	1	0	0	0	0	0	0	0	0	1	0	0	0	0	0	0	0	0	0	0	0	1	0	1	0	0	1	1	0	0				0	1	0	0	0	0
209	0	52.3258	172	63	21.2953	1	20	0	0	0	0	0	0	0	0	0	0	0	0	0	0	0	0	0	0	0	0	0	0	0	0	0	0	0	0	0	0	0	0	0				0	0	0	0	0	0
280	0	52.3833	171	118	40.3543	1	37	0	0	0	0	0	0	0	0	0	0	0	0	0	0	0	0	0	0	0	0	0	0	0	0	0	0	0	0	0	1	1	1	1	7	12	336	0	2	0	1	0	0
15	1	52.4654	182	89	26.8687	1	22.5	0	0	0	0	0	0	0	0	0	0	0	0	0	0	0	0	0	0	0	0	0	0	0	0	0	0	0	0	0	0	0	1	1	0.5	12	24	0	0	0	0	1	0
354	0	52.5832	161	65	25.0762	1	45	0	0	0	0	0	0	0	0	0	0	1	0	1	0	0	0	0	0	0	0	0	0	0	1	0	1	2	0	0	1	1	1	0				0	1	0	0	1	0
3	1	52.6434	174	60	19.8177	1	52.5	0	0	0	0	0	0	0	0	0	0	0	0	0	0	0	0	0	0	0	0	0	0	0	0	0	0	0	0	0	0	0	1	1	1.5	10	60	0	0	0	0	0	0
383	0	52.6489	169	74	25.9095	1	30	0	0	0	0	0	0	0	0	0	0	0	0	0	0	0	0	0	0	0	0	0	0	0	0	0	0	0	0	1	1	1	1	1				1	1	1	1	1	0
92	0	52.6543	167	65	23.3067	1	22.5	0	0	0	0	1	0	0	0	0	0	0	0	1	0	0	0	0	0	0	0	0	0	0	0	0	0	0	0	0	0	0	1	0				0	0	0	0	0	0
63	1	52.668	190	100	27.7008	1	54	0	0	0	0	1	0	0	0	0	0	0	0	1	0	0	0	0	1	0	0	0	0	0	0	0	0	1	0	0	0	1	1	1	5	2	40	0	0	1	0	1	0
411	0	52.679	156	68	27.9421	1	45	0	0	0	0	0	0	0	0	0	0	0	0	0	0	0	0	0	0	0	0	0	0	0	0	0	0	0	0	0	0	0	0	0				0	2	0	1	0	0
128	1	52.6982	180	65	20.0617	1	43.75	0	1	0	0	0	0	0	0	0	0	0	0	1	1	0	0	0	0	0	0	0	0	0	0	0	0	1	0	0	1	0	1	1	1	12	48	1	0	0	1	0	0
108	1	52.8323	181	98	29.9136	0	34.5	0	1	0	0	1	0	0	0	0	0	0	0	2	1	0	0	0	0	0	0	0	0	0	0	0	0	2	0	0	0	0	0	0				0	0	0	0	0	0
43	0	52.8789	164	64	23.7954	0	45	0	0	0	0	1	0	0	0	0	0	0	0	1	0	0	0	0	0	0	1	0	0	0	0	0	0	1	0	0	0	0	0	0				0	1	0	1	0	0
96	1	52.9692	190	112	31.0249	1	49.5	0	0	0	0	0	0	0	0	0	0	0	0	0	0	0	0	0	0	0	0	0	0	0	0	0	0	0	0	0	0	0	1	1	7	12	336	0	0	0	0	0	0
149	1	53.0541	168	80	28.3447	1	52.5	0	1	0	0	0	0	0	0	0	0	0	0	1	0	0	0	0	0	0	0	0	0	0	0	0	0	0	0	0	0	0	0	0				0	0	0	0	1	1
146	1	53.1088	172	94	31.7739	1	74	0	1	0	0	0	0	0	0	0	0	0	0	1	0	0	0	0	1	0	0	0	0	0	1	0	0	2	0	0	1	1	1	1	7	2	56	0	0	0	0	0	1
81	1	53.1143	180	92	28.3951	1	35	0	1	0	0	0	1	0	0	0	0	0	0	2	0	1	0	0	0	0	0	0	0	1	1	0	0	3	0	0	0	0	1	1	2	12	96	0	0	0	0	1	0
237	1	53.117	187	78	22.3055	1	30	0	0	0	0	0	0	0	0	0	0	0	0	0	0	0	0	0	0	0	0	0	0	0	0	0	0	0	0	0	1	1	1	1	3	12	144	0	1	1	1	1	0
229	1	53.1636	186	84	24.2803	1	35	1	0	0	0	1	0	0	0	0	0	0	0	0	0	0	0	0	0	0	0	0	0	0	0	0	0	0	0	0	1	0	1	1	1	12	48	0	0	0	0	0	0
347	0	53.232	164	58	21.5645	1	30	0	1	0	0	0	0	0	0	0	0	0	0	1	1	0	0	0	0	0	0	0	0	0	0	0	0	1	0	0	0	0	0	0				0	0	0	0	0	0
54	0	53.2621	163	64	24.0882	1	25	0	1	0	0	0	0	0	0	0	1	0	0	2	0	1	0	0	0	1	0	0	0	0	1	0	0	3	0	0	0	0	1	1	2	2	16	0	1	0	0	0	0
113	0	53.3415	169	75	26.2596	1	34	0	0	0	0	1	0	0	0	0	0	0	0	1	0	0	0	0	1	0	0	0	0	0	0	0	0	1	1	0	1	0	1	0				0	0	0	1	1	0
48	0	53.4292	167	60	21.5139	1	35	0	0	0	0	0	0	0	0	0	0	0	0	0	0	0	0	0	0	0	0	0	0	0	0	0	0	0	0	0	0	0	0	0				0	0	0	0	0	0
396	1	53.4593	180	75	23.1481	0	30	0	0	0	0	0	0	0	0	0	0	0	0	0	0	0	0	0	0	0	0	0	0	0	0	0	0	0	0	0	0	0	0	0				0	0	0	0	0	0
13	0	53.5277	162	96	36.5798	1	35	0	1	0	0	0	0	0	0	0	0	0	0	1	0	1	0	1	0	0	0	0	0	0	0	0	0	2	1	1	0	0	1	1	1	12	48	0	0	0	0	0	0
126	0	53.5633	175	60	19.5918	1	43.75	0	0	0	0	0	0	0	0	0	0	0	0	0	0	0	0	0	0	0	0	0	0	0	0	0	0	0	1	0	1	0	1	1	7	12	365	0	0	0	1	0	0
150	0	53.5989	167	63	22.5896	1	30	0	0	0	0	0	0	0	0	0	1	0	0	1	0	0	0	0	0	0	0	0	0	0	0	0	0	0	0	0	1	0	1	1	7	6	168	0	1	0	0	1	0
175	0	53.629	164	74	27.5134	1	48.75	0	0	0	0	0	0	0	0	0	0	0	1	1	0	0	0	0	0	0	0	0	0	0	0	0	0	0	0	0	0	0	0	0				0	1	0	0	1	1
220	0	53.6345	163	64	24.0882	1	26.25	0	0	0	1	0	0	0	0	1	0	0	0	2	0	0	0	0	0	0	0	0	0	0	0	1	0	1	0	0	0	0	0	0				0	0	0	0	1	0
222	0	53.6345	163	64	24.0882	1	26.25	0	0	0	1	0	0	0	0	1	0	0	1	3	0	0	0	0	0	0	0	0	0	0	0	1	0	2	1	1	0	0	0	0				0	0	0	0	1	0
188	1	53.7851	178	70	22.0932	1	30	1	1	0	0	0	0	0	1	0	0	0	0	3	1	0	1	1	1	0	0	0	0	0	0	0	0	4	0	0	1	0	1	1	2	12	96	0	0	0	0	1	1
323	0	53.8042	160	73	28.5156	1	22.5	0	0	0	0	0	0	0	0	0	0	0	0	0	0	0	0	0	0	0	0	0	0	0	0	0	0	0	0	0	0	0	0	0				0	0	0	0	0	0
330	0	53.9521	164	68	25.2826	1	45	0	1	0	0	0	0	0	0	0	0	0	0	1	0	1	1	0	0	0	0	0	0	0	0	0	0	2	0	0	1	0	1	1	7	12	336	0	2	1	1	1	0
32	1	54.0096	175	76	24.8163	1	30	0	0	0	1	0	0	1	0	0	0	0	0	2	0	0	0	0	0	0	0	0	0	0	0	0	0	0	0	0	1	1	1	1	7	5	140	0	1	0	0	0	0
22	0	54.0917	164	64	23.7954	1	35	0	0	0	0	1	0	0	0	0	0	0	0	1	0	0	0	0	1	0	0	0	0	0	0	0	0	1	0	0	0	0	1	1	1	12	48	0	0	0	0	0	0
246	0	54.193	175	87	28.4082	1	40	0	0	0	0	0	0	0	0	0	0	0	0	0	0	0	0	0	0	0	0	0	0	0	1	0	0	1	0	0	1	0	1	1	2	12	96	0	0	0	0	1	1
352	0	54.2916	175	73	23.8367	1	20	0	0	0	0	0	0	0	0	0	0	0	0	0	0	0	0	0	0	0	0	0	0	0	0	0	0	0	0	0	1	0	1	1	2	12	96	0	2	0	0	0	0
367	0	54.3436	172	70	23.6614	1	20	0	0	0	1	0	0	0	0	0	1	0	0	2	0	0	0	0	0	1	0	0	0	0	0	0	0	1	0	0	0	0	0	0				0	0	0	0	0	0
444	0	54.3518	164	58	21.5645	1	20	0	0	0	0	0	0	0	0	0	0	0	0	0	0	0	0	0	0	0	0	0	0	0	0	0	0	0	0	0	1	0	1	1	4	12	192	0	0	0	0	0	0
116	0	54.36	163	70	26.3465	1	45	0	1	0	0	1	0	0	0	0	0	0	0	2	1	0	0	0	1	0	0	1	0	0	0	0	0	3	0	0	0	0	0	0				0	1	0	1	1	0
305	1	54.5544	182	90	27.1706	1	35	0	1	0	0	0	0	0	0	0	0	0	0	1	0	0	1	0	0	0	0	0	0	0	0	0	0	1	0	0	0	0	0	0				0	1	0	0	0	0
212	1	54.5708	192	103	27.9405	1	40	0	0	0	0	0	0	0	0	0	0	0	0	0	0	0	0	0	0	0	0	0	0	0	0	0	0	0	0	0	0	0	0	0				0	0	0	0	0	0
254	1	54.7077	182	82	24.7555	1	76	0	0	1	0	0	0	0	0	0	0	0	0	1	0	0	0	0	0	0	0	0	0	1	0	0	0	1	0	0	1	1	1	0				0	1	0	0	1	0
442	0	54.7406	168	74	26.2188	1	31	0	0	0	0	0	0	0	0	0	0	0	0	0	0	0	0	0	0	0	0	1	0	0	1	0	0	2	0	0	1	0	1	1	7	12	336	0	1	0	0	0	1
450	0	54.7488	165	67	24.6097	1	20	0	0	0	0	0	0	0	0	0	0	0	0	0	0	0	0	0	0	0	0	0	0	0	0	0	0	0	0	0	0	0	0	0				0	0	0	0	0	0
447	0	54.7734	170	65	22.4913	1	33	0	0	0	0	0	0	0	0	0	0	0	0	0	0	0	0	0	0	1	0	0	0	0	0	0	0	1	0	0	0	0	0	0				0	0	0	0	0	0
405	0	54.7762	156	68	27.9421	1	20	0	0	0	0	0	0	0	0	0	0	0	0	0	0	0	0	0	0	0	0	0	0	0	0	0	0	0	0	0	0	0	0	0				0	1	0	1	0	0
225	1	54.7789	182	90	27.1706	1	48.75	0	0	0	0	0	0	0	0	0	0	0	0	0	0	0	0	0	0	0	0	0	0	0	0	0	0	0	0	0	1	0	1	1	7	3	90	0	0	0	0	1	1
14	0	54.8912	166	74	26.8544	1	37	0	1	0	0	0	0	0	0	0	0	0	0	1	1	0	0	0	1	0	0	0	0	0	0	0	0	2	0	0	0	1	1	1	2	12	96	0	1	0	1	0	0
51	0	54.9158	168	75	26.5731	1	30	0	0	0	1	0	0	0	0	0	0	0	0	1	0	0	0	0	0	0	0	0	1	0	0	0	0	1	0	0	0	0	0	0				0	0	0	0	0	0
419	1	54.935	189	115	32.1939	0	20	1	1	0	0	0	0	0	0	0	0	0	0	2	0	0	0	0	0	0	0	0	0	0	0	0	0	0	0	0	0	0	0	0				0	0	0	0	0	0
265	0	54.9815	170	73	25.2595	1	26.25	0	0	0	0	0	0	0	0	1	0	0	0	1	0	0	0	0	0	0	0	0	0	0	0	0	0	0	0	0	0	0	0	0				0	1	0	0	0	0
230	0	55.0554	163	60	22.5827	1	31.25	0	0	0	0	1	0	0	0	0	0	0	0	0	0	0	0	0	0	0	0	0	0	0	0	1	0	1	0	0	1	1	1	1	5	12	240	0	1	0	1	0	0
194	0	55.0773	175	70	22.8571	1	18.75	0	0	0	0	0	0	0	0	0	0	0	0	0	0	0	0	0	0	0	0	0	0	0	0	0	0	0	0	0	0	0	0	0				0	0	0	0	0	0
208	1	55.0992	189	104	29.1145	0	52.5	0	1	0	0	0	0	0	0	0	0	0	0	1	0	0	1	0	0	0	0	0	0	0	0	0	0	1	0	0	1	0	1	1	7	2	56	0	2	0	0	1	0
136	0	55.1157	153	57	24.3496	1	50	0	0	0	0	0	0	0	0	0	0	0	1	1	0	0	0	0	0	0	0	0	0	0	0	0	0	0	0	0	0	0	0	0				0	0	0	0	0	0
158	1	55.1814	180	84	25.9259	0	40	0	0	0	0	0	0	0	0	0	0	0	0	0	0	0	0	0	0	0	0	0	0	0	0	0	0	0	0	0	1	1	1	1	7	12	336	0	1	0	0	0	0
226	0	55.1978	171	90	30.7787	1	35	0	0	0	0	0	0	0	0	0	0	0	0	0	0	0	0	0	0	0	0	0	0	0	0	0	0	0	0	0	1	0	1	1	7	12	365	0	1	0	1	1	0
322	1	55.2088	172	74	25.0135	0	75	0	0	0	0	0	0	0	0	0	0	0	0	0	0	0	0	0	0	0	0	0	0	0	0	0	0	0	0	0	0	0	0	0				0	0	0	0	1	0
168	1	55.2717				0	50	0	0	0	0	0	0	0	0	0	0	0	0	0	0	0	0	0	0	0	0	0	0	0	0	0	0	0	0	0	0	0	1	1	7	2	56	0	2	1	1	0	0
338	0	55.332	163	48	18.0662	1	40	0	0	0	1	0	0	0	0	0	0	0	0	1	0	0	0	0	0	0	0	0	0	0	0	0	0	0	0	0	1	1	1	1	7	12	336	0	1	0	1	1	0
415	1	55.3621	178	98	30.9304	1	39	0	0	0	0	0	0	0	0	0	0	0	0	0	0	0	0	0	0	0	0	0	0	0	0	0	0	0	0	0	0	0	0	0				0	0	0	0	0	0
141	0	55.436	157	60	24.3418	1	21.875	0	1	0	0	1	0	0	1	0	0	0	0	3	1	1	1	0	0	0	1	0	0	0	0	0	0	4	0	0	1	1	0	0				0	0	0	0	0	0
235	0	55.4634	162	74	28.1969	1	35	0	0	0	0	0	0	0	0	0	0	0	1	1	0	0	0	0	0	0	0	0	0	0	1	0	0	1	0	0	1	1	0	0				0	2	0	1	0	0
75	0	55.5264	172	87	29.4078	1	45	0	1	0	0	0	0	0	0	0	0	0	0	1	0	0	0	0	0	0	0	0	0	0	0	0	0	0	0	0	1	1	1	1	7	12	336	0	0	1	1	0	0
147	0	55.5264	164	70	26.0262	0	46.5	0	0	0	0	0	0	0	1	0	0	0	0	1	1	0	0	0	1	0	1	0	0	0	0	0	0	3	0	0	1	0	1	1	7	2	56	0	0	0	0	0	0
204	1	55.5264	178	94	29.668		20	0	0	0	0	0	0	0	0	0	0	0	0	0	0	0	0	0	0	0	0	0	0	0	0	0	0	0			0	0	0	0				0	0	0	0	1	0
156	1	55.5811	183	83	24.7843	0	30	0	0	0	0	0	0	0	0	0	0	0	1	1	0	0	0	0	0	0	0	0	0	0	0	0	0	0	0	0	0	0	0	0				0	0	0	0	0	0
60	1	55.5948	175	92	30.0408	0	35	0	1	0	0	1	0	0	0	0	0	0	0	2	1	0	0	1	1	0	0	0	0	0	0	0	0	3	0	0	0	1	1	0				0	1	0	0	0	0
143	0	55.6194	159	80	31.6443	1	70	0	0	0	0	0	0	0	0	0	0	0	0	0	0	0	0	0	0	0	0	0	0	0	0	0	0	0	0	0	1	1	1	1	1	2.5	10	0	1	0	0	0	0
130	1	55.6331	184	76	22.448	1	52.5	0	0	0	0	0	0	0	0	0	0	0	0	0	0	0	0	0	0	0	0	0	0	0	0	0	0	0	1	0	1	0	1	1	7	12	365	0	0	0	0	0	0
282	0	55.6934	165	64	23.5078	1	25.5	0	0	0	0	0	0	0	0	0	0	0	0	0	0	0	0	0	1	0	0	0	0	0	0	0	0	1	0	0	1	1	1	1	7	12	336	0	1	0	1	0	0
214	0	55.6988	161	77	29.7056	1	34.375	0	0	0	0	0	0	0	0	0	0	0	0	0	0	0	0	0	0	0	0	0	0	0	1	0	0	1	0	0	1	0	1	1				0	0	0	1	0	0
159	0	55.7591	168	72	25.5102	1	48	0	1	0	0	0	0	0	0	0	0	0	0	1	0	1	1	0	0	0	0	0	0	0	0	0	0	2	0	0	0	0	0	0				0	0	0	0	0	0
334	0	55.7755	168	59	20.9042	1	20	0	0	0	0	0	0	0	0	0	0	0	0	0	0	0	0	0	0	0	0	0	0	0	0	0	0	0	0	0	0	0	0	0				0	0	0	0	1	0
10	0	55.8549	163	53	19.9481	1	60	0	0	0	0	0	0	0	0	0	0	0	0	0	0	0	0	0	0	0	0	0	1	0	0	0	0	1	0	0	0	0	1	0				0	0	0	0	1	0
35	0	56.1424	165	70	25.7117	1	17.85	0	1	0	0	0	0	0	0	0	0	0	0	1	1	1	0	1	0	0	0	0	0	0	0	0	0	3	0	0	1	0	1	1	2	1	8	0	0	0	0	0	0
343	0	56.1588	168	92	32.5964	1	25	0	0	0	0	0	0	0	0	0	0	0	0	0	0	0	0	0	0	0	0	0	0	0	0	0	0	0	0	0	1	0	1	1	2	12	96	0	2	0	1	0	0
353	0	56.2546	172	93	31.4359	1	43.75	0	0	0	0	0	0	0	0	0	0	0	0	0	0	0	0	0	0	0	0	0	0	0	0	0	0	0	0	0	1	1	1	1	5	12	240	0	2	0	0	0	0
437	1	56.3368	174	84	27.7447	1	36	0	0	0	0	1	0	0	0	0	0	0	0	1	0	0	0	0	0	0	0	0	0	0	0	0	0	0	0	0	1	1	1	1				0	1	1	1	0	0
94	0	56.4408	168	88	31.1791	1	52	0	0	0	0	0	0	0	0	0	0	0	0	0	0	0	0	0	0	0	0	0	0	0	0	0	0	0	0	0	0	0	1	1	7	12	336	0	1	0	0	0	0
99	0	56.4682	174	72	23.7812	1	36	0	1	0	0	0	0	0	0	0	0	0	0	1	1	0	0	1	0	0	0	0	0	0	0	0	0	2	0	0	0	0	0	0				0	1	0	0	0	0
7	0	56.4819	170	72	24.9135	0	35	0	0	0	0	0	0	0	0	0	0	0	0	0	0	0	0	0	0	0	0	0	0	0	0	0	0	0	0	0	0	0	0	0				0	0	0	1	0	0
431	1	56.553	169	88	30.8112	1	45	0	0	0	0	0	0	0	0	0	0	0	0	0	0	0	0	0	0	0	0	0	0	0	0	0	0	0	0	0	0	0	0	0	1	2	8	0	1	0	0	1	0
90	1	56.6297	182	91	27.4725	1	55.1	0	0	0	0	1	0	0	0	0	0	0	0	1	0	0	0	0	1	0	0	0	0	0	0	0	0	1	0	0	1	1	1	1	0.25	12	12	0	1	0	1	1	0
42	1	56.6516	183	92	27.4717	1	30	0	1	0	0	0	0	0	0	0	0	0	0	1	1	0	0	0	1	0	0	0	0	0	0	0	0	2	0	0	0	0	1	1	1	12	48	0	0	0	0	0	0
153	0	56.6543	163	65	24.4646	1	40	0	0	0	0	0	0	0	0	0	0	0	0	1	0	0	0	0	0	0	0	0	0	0	0	0	0	0			1	0	1	1				0	1	0	1	0	0
4	0	56.783	168	74	26.2188	1	18	0	0	0	0	0	0	0	0	0	0	0	0	0	0	0	0	0	0	0	0	0	0	0	0	0	0	0	0	0	1	0	1	1	1	12	48	0	1	0	0	0	0
213	0	56.8761	170	60	20.7612	1	61.25	0	0	0	0	0	0	0	0	0	0	0	0	0	0	0	0	0	0	0	0	0	1	0	0	0	0	1	0	0	1	0	1	1	7	12	336	1	0	0	1	0	0
398	1	56.9391	176	95	30.6689	0	90	0	0	0	0	0	0	0	0	0	0	0	0	0	0	0	0	0	0	0	0	0	0	0	0	0	0	0	0	0	1	1	0	0				0	2	0	0	0	0
279	0	57.0294	164	72	26.7698	1	25	0	0	0	0	0	0	0	0	0	0	0	0	0	0	0	0	0	0	0	0	0	0	0	0	0	0	0	0	0	1	1	0	0				0	1	0	0	0	0
18	1	57.0513	185	85	24.8356	1	40	0	0	0	0	0	0	0	0	0	0	0	0	0	0	0	0	0	0	0	0	0	0	0	0	0	0	0	0	0	0	0	0	0				0	0	0	0	1	0
77	0	57.0513	177	68	21.7051	1	20	0	1	0	0	0	0	0	0	0	0	0	0	1	0	0	0	0	0	0	0	0	0	0	0	0	0	0	0	0	0	0	1	0				0	0	0	0	0	0
384	1	57.0678	178	65	20.5151	1	40	0	0	0	0	0	0	0	0	0	0	0	0	0	0	0	0	0	0	0	0	0	0	0	0	0	0	0	0	0	0	0	0	0				0	2	0	0	1	0
370	0	57.128	162	90	34.2936	1	40	0	1	0	0	0	0	0	0	0	0	0	0	1	0	1	1	0	0	0	0	0	0	0	0	0	0	2	0	0	1	1	1	0				1	1	1	0	1	0
413	1	57.1335	173	80	26.7299	0	20	0	0	0	0	0	0	0	0	0	0	0	0	0	0	0	0	0	0	0	0	0	0	0	0	0	0	0	0	0	0	0	0	0				0	0	0	0	0	0
256	1	57.1472	178	80	25.2493	1	70	0	0	0	0	0	0	0	0	0	0	0	0	0	0	0	0	0	0	0	0	0	0	0	0	0	0	0	0	0	1	0	1	1	4	12	192	0	1	0	0	1	1
172	1	57.1554	177	69	22.0243	1	40	0	0	0	0	0	0	0	0	0	0	0	0	0	0	0	0	0	0	0	0	0	0	0	0	0	0	0	0	0	1	0	1	1	3	1	12	0	0	0	0	1	0
321	1	57.1855	180	96	29.6296	1	26.25	0	1	1	0	0	0	1	0	0	0	0	0	3	0	0	1	1	0	0	0	0	0	1	0	0	0	3	0	0	1	0	1	1	3	12	144	0	0	0	0	1	1
23	0	57.191	168	70	24.8016	1	22.5	0	0	0	0	0	0	0	0	0	0	0	0	0	0	0	0	0	0	0	0	0	0	0	0	0	0	0	0	0	0	0	0	0				0	0	0	0	0	0
389	1	57.2047	178	90	28.4055	1	20	0	1	1	0	0	0	0	0	0	0	0	0	2	1	0	0	0	0	0	0	0	0	0	0	0	0	1	0	0	0	0	0	0				0	1	1	0	1	0
64	1	57.2101	193	99	26.5779	0	48	0	1	0	0	0	0	0	0	0	0	0	0	1	1	1	0	1	0	0	0	0	0	0	0	0	0	3	0	0	0	0	0	0				0	0	0	0	0	0
38	1	57.2129	182	77	23.246	1	80	0	0	0	0	1	0	0	0	0	0	0	0	1	0	0	0	0	0	0	0	0	0	0	0	0	0	0	0	0	0	0	1	1	1	12	48	0	0	0	0	0	0
107	1	57.2649	183	97	28.9647	0	30	0	0	0	0	0	1	0	0	0	0	0	0	1	0	0	0	0	0	0	0	0	0	0	1	0	0	1	0	0	0	0	0	0				0	0	0	0	1	0
378	1	57.2676	171	72	24.623	0	64.5	0	0	0	0	0	0	0	0	0	0	0	0	0	0	0	0	0	0	0	0	0	0	0	0	0	0	0	0	0	0	0	0	0				1	1	0	0	0	0
371	1	57.358	174	90	29.7265	1	42	0	1	0	0	0	0	0	0	0	0	0	0	1	1	1	0	0	0	0	0	0	0	0	0	0	0	2	0	0	1	0	1	1	2	12	96	0	2	0	0	1	0
78	0	57.3717	170	73	25.2595	1	24	0	1	0	0	0	0	0	0	0	0	0	0	1	1	0	0	0	0	0	0	0	0	0	0	0	0	1	0	0	0	0	0	0				0	0	0	0	1	0
274	0	57.4456	163	83	31.2394	1	20	0	0	0	0	0	0	0	0	0	0	0	1	1	0	0	0	0	0	0	0	0	0	0	0	0	0	0	0	0	1	1	1	1	3	12	144	1	1	0	0	1	0
315	0	57.5551	174	76	25.1024	1	37	0	0	0	0	0	0	0	0	0	0	0	0	0	0	0	0	0	0	0	0	0	0	0	0	0	0	0	0	0	1	0	1	1	7	12	336	0	1	0	1	1	1
381	0	57.6208	160	73	28.5156	1	43.75	0	1	0	0	0	0	0	0	0	0	0	0	1	1	1	0	0	0	0	0	0	0	0	0	0	0	2	0	0	1	1	1	1	4	12	192	0	1	0	0	1	0
179	0	57.6509	164	59	21.9363	1	37	0	0	0	1	0	0	0	0	0	0	0	0	1	0	0	0	0	0	0	0	0	0	0	0	0	0	0	0	0	1	1	1	1	7	12	365	0	2	0	1	1	0
82	1	57.7467	178	86	27.143	1	45	0	0	0	0	0	0	0	0	0	0	0	0	0	0	0	0	0	0	0	0	0	0	0	0	0	0	0	0	0	1	0	1	1	2	12	96	0	1	0	0	1	0
67	0	57.8535	170	55	19.0311	1	40	0	0	0	0	1	0	0	0	0	0	0	0	1	0	0	0	0	0	0	0	0	0	0	0	0	0	0	0	0	1	0	1	0	0	0	0	0	1	0	0	0	0
335	1	57.859	170	80	27.6817	1	30	0	0	0	0	0	0	0	0	0	0	0	0	0	0	0	0	0	0	0	0	0	0	0	0	0	0	0	0	0	0	0	0	0				0	1	0	0	1	0
341	1	57.859	167	91	32.6294	1	43.75	0	1	0	0	0	0	1	0	0	0	0	0	2	0	1	0	1	0	0	0	0	0	0	0	0	0	2	0	0	1	1	1	1	7	12	336	0	2	0	0	1	1
210	1	57.9001	175	84	27.4286	1	84	0	1	0	1	0	0	1	0	0	0	0	0	3	1	1	0	0	1	0	0	0	0	0	0	1	0	4	0	0	1	1	1	0				0	0	0	1	0	0
360	1	57.9192	180	100	30.8642	0	20	0	0	0	0	0	0	0	0	0	0	0	0	0	0	0	0	0	0	0	0	0	0	0	0	0	0	0	0	0	0	0	0	0				0	0	0	0	0	0
425	0	57.9603	165	87	31.9559	1	40	0	0	0	0	0	0	0	0	0	0	0	0	0	0	0	0	0	0	0	0	0	0	0	0	0	0	0	0	0	0	0	0	0				0	1	0	1	1	1
66	0	57.9685	170	80	27.6817	1	22.5	0	0	1	0	0	0	0	0	0	0	0	1	2	0	0	0	0	0	0	0	0	0	0	0	0	0	0	0	1	1	0	1	1	5	3	60	0	0	0	1	0	0
135	0	58.0342	159	70	27.6888		20	0	0	0	0	0	0	0	0	0	0	0	0	0	0	0	0	0	0	0	0	0	0	0	0	0	0	0	0	0	0	0	0	0				0	0	0	0	0	0
346	0	58.0397	167	74	26.5338	1	35	0	1	0	0	0	0	0	0	0	0	0	0	1	1	0	1	0	0	0	0	0	0	0	0	0	0	2	0	0	1	0	1	1	2	12	96	0	1	0	1	1	0
69	0	58.1602	157	54.5	22.1104	1	5	0	0	0	0	0	0	0	0	0	0	0	0	0	0	0	0	0	0	0	0	0	0	0	0	0	0	0	0	0	0	0	1	0				0	0	0	0	0	0
1	1	58.1985	188	88	24.8981	1	11	0	1	0	0	0	0	0	0	0	0	0	0	1	0	0	1	0	0	0	0	0	0	0	0	0	0	1	0	0	0	0	0	0				0	1	0	0	1	0
364	0	58.2533	160	65	25.3906	1	52.5	0	1	0	0	1	0	0	0	0	0	0	0	2	0	0	0	0	1	0	0	0	0	0	0	0	0	1	0	0	1	1	1	0				0	1	0	0	1	0
74	0	58.2587	158	57	22.8329	1	35	0	0	0	1	1	0	0	0	0	0	0	0	2	0	0	0	0	1	0	0	0	0	0	0	1	0	2	0	0	1	1	1	1	7	12	336	0	0	0	0	1	0
124	1	58.2834	186	88	25.4365	1	60	0	0	0	0	0	0	0	0	0	0	0	0	0	0	0	0	0	0	0	0	0	0	0	0	0	0	0	0	0	0	0	0	0				0	0	0	0	1	0
211	1	58.2834	187	88	25.1651	1	60	0	0	0	0	0	0	0	0	0	0	0	0	0	0	0	0	0	0	0	0	0	0	0	0	0	0	0	0	0	0	0	0	0				0	0	0	0	1	0
416	1	58.3107	168	68	24.093	1	58.5	0	0	0	0	0	0	0	0	0	0	0	0	0	0	0	0	0	1	0	0	0	0	0	0	0	0	1	0	0	0	0	0	0				0	0	0	0	0	0
24	1	58.3135	192	110	29.8394	0	64.5	0	0	1	0	0	0	0	1	0	0	0	0	2	1	0	1	0	1	0	0	0	0	1	0	0	0	4	0	0	0	0	0	0				0	0	0	0	1	1
418	0	58.3546	167	72	25.8166	1	30	0	0	0	0	0	0	0	0	0	0	0	0	0	0	0	0	0	0	0	0	1	0	0	0	0	0	1	0	0	0	1	0	1				0	0	0	0	0	0
206	1	58.4942	172	97	32.788	1	90	0	1	0	0	0	0	1	0	0	0	0	0	2	1	1	1	0	0	0	0	0	0	0	0	0	0	3	0	0	1	1	1	1	7	1	28	0	0	1	1	1	1
117	0	58.6229	162	80	30.4832	1	30	0	0	1	0	0	0	0	0	0	0	0	0	1	0	1	0	0	0	0	0	0	0	1	0	0	0	2	0	0	0	0	0	0				0	1	1	1	0	0
154	0	58.6694	166	65	23.5883	0	15	0	0	0	0	0	0	0	0	0	0	0	0	1	0	0	0	0	1	0	0	0	0	0	0	0	0	1	0	0	0	0	0	0				0	0	0	0	0	0
215	0	58.6886	172	80	27.0416	1	12.5	0	0	0	0	0	0	0	0	0	0	0	1	1	0	0	0	0	0	0	0	1	0	0	0	0	0	1	0	0	1	1	0	0				0	2.3	0	1	0	1
178	0	58.7625	169	87	30.4611	1	15	0	0	0	0	0	0	0	0	0	0	0	0	0	0	0	0	0	0	1	0	0	0	0	0	0	0	1	0	0	1	0	1	1	7	3	84	0	1	0	0	1	1
148	0	58.7707	168	68	24.093	1	20	0	1	0	0	0	0	0	0	0	0	0	0	1	0	1	1	0	0	0	0	0	0	0	0	0	0	2	0	0	1	0	1	1	1	12	48	0	1	0	0	1	0
339	1	58.9569	172	63	21.2953	1	44	0	0	0	0	0	0	0	0	0	0	0	0	0	0	0	0	0	0	0	0	0	0	0	0	0	0	0	0	0	0	0	0	0				0	0	0	0	1	1
138	1	58.9678	192	102	27.6693	1	60	0	1	1	0	1	0	0	0	0	0	0	0	3	1	0	0	0	1	0	0	0	0	1	0	0	0	3	0	0	1	0	1	1	7	12	336	1	1	0	1	0	0
421	0	58.976	165	73	26.8136	1	42	1	0	0	0	0	0	0	0	0	0	0	0	1	0	0	0	0	0	0	0	0	0	0	0	0	0	0	1	1	0	1	1	1				0	2	0	0	0	0
228	1	59.0801	180	84	25.9259	1	94	0	0	0	0	0	0	0	0	0	0	0	0	0	0	0	0	0	0	0	0	0	0	0	0	0	0	0	0	0	0	0	0	0				0	1	0	0	0	0
202	1	59.102	176	105	33.8972	1	52.5	0	1	0	0	0	0	0	0	0	0	0	0	1	1	0	0	0	0	0	0	0	0	0	0	0	0	1	0	0	0	0	0	0				0	0	0	0	1	0
170	1	59.1759	174	83	27.4145	1	66.625	0	0	0	0	0	0	0	0	0	0	0	0	0	0	0	0	0	0	0	0	0	0	0	0	0	0	0	0	0	1	0	1	1	3	12	144	0	0	0	0	0	0
357	0	59.1869	164	78	29.0006	1	22.5	0	1	0	0	0	0	0	0	0	0	0	0	1	1	0	0	1	0	0	0	0	0	0	0	0	0	2	0	0	1	0	1	1	3	3	36	0	1	0	1	0	0
287	0	59.2225	161	77	29.7056	1	30	0	1	1	0	0	0	0	0	0	0	0	0	2	1	1	1	1	0	0	0	0	0	1	0	0	0	5	0	0	1	0	1	1	7	3	84	0	1	0	1	1	0
278	1	59.269	170	80	27.6817	1	30	0	0	1	0	0	0	0	0	0	0	0	0	1	0	1	0	0	0	0	0	0	0	1	0	0	0	2	0	0	0	0	0	0				1	1	0	1	0	0
73	1	59.2772	175	93	30.3673	1	37.5	0	1	0	0	0	0	0	0	0	0	0	0	1	0	1	0	0	0	0	0	0	0	0	0	0	0	1	0	0	0	0	0	0				0	0	0	0	1	0
101	0	59.4086	165	79	29.0174	1	45	0	1	0	0	0	0	0	0	0	1	0	0	2	1	0	1	1	0	1	0	0	0	0	0	0	0	4	0	0	0	0	0	0				0	1	0	0	1	0
140	0	59.5044	160	59	23.0469	1	40	0	0	0	0	0	0	0	0	0	0	0	0	0	0	0	0	0	0	0	0	0	0	0	0	0	0	0	0	0	1	0	1	1	3	12	144	0	3	0	1	1	1
263	0	59.5099	159	75	29.6665	1	40	0	1	0	0	0	0	0	0	0	0	0	0	1	1	0	0	0	1	0	0	0	0	0	0	0	0	2	0	0	1	1	1	1	7	12	336	0	2	0	0	1	1
449	1	59.5181	170	100	34.6021	0	22	0	0	0	0	0	0	0	0	0	0	0	0	0	0	0	0	0	0	0	0	0	0	0	0	0	0	0	0	0	0	0	0	0				0	0	0	0	0	0
387	0	59.5838	163	78	29.3575	1	37.5	0	1	0	0	0	0	0	0	0	0	0	0	1	0	1	0	0	0	0	0	0	0	0	0	0	0	1	0	0	0	0	0	0				0	0	0	0	0	0
326	0	59.7864	165	64	23.5078	1	18.75	0	1	0	0	0	0	0	0	0	0	0	0	1	0	1	0	0	0	0	0	0	0	0	0	0	0	1	0	0	1	1	0	0				0	1	0	1	1	0
337	0	59.8522	161	75	28.9341	1	35	0	0	0	0	0	0	0	0	0	1	0	0	1	0	0	0	0	0	1	0	0	0	0	0	0	0	1	0	0	1	1	1	1	3	12	144	0	1	1	0	0	0
189	0	59.8631	157	65	26.3702	1	30	0	1	0	0	1	0	0	0	0	0	0	0	2	0	1	1	0	1	0	0	0	0	0	0	0	0	3	0	0	1	1	1	1	7	12	336	1	0	0	0	1	0
345	0	59.9014	176	85	27.4406	1	40	0	0	1	0	0	0	1	0	0	0	0	0	2	0	1	0	0	1	0	0	0	0	1	0	0	0	3	0	0	1	1	1	1	3	12	144	0	1	0	1	1	0
401	1	60.0575	179	71	22.1591	1	80	1	1	0	0	0	1	0	0	0	0	0	0	3	0	0	0	0	0	0	0	0	0	0	0	0	0	0	0	0	1	1	1	1	7	12	336	0	3	1	1	1	0
286	0	60.1588	154	55	23.1911	1	31.5	0	0	1	0	0	0	0	0	0	0	0	0	1	1	1	1	1	0	0	0	0	0	1	0	0	0	5	0	0	1	1	1	1	7	2	56	0	0	0	0	1	0
331	0	60.1615	174	84	27.7447	1	34	0	1	0	0	0	0	0	0	0	0	0	0	1	1	0	0	0	0	0	0	0	0	0	0	0	0	1	0	0	1	0	1	1	1	12	48	0	1	0	0	1	0
245	1	60.2546	158	64	25.6369	0	60	0	0	0	0	0	0	0	0	0	0	0	0	0	0	0	0	0	0	0	0	0	0	0	1	0	0	1	0	0	1	0	1	1	1	12	48	0	1	0	0	1	0
440	0	60.2765	166	65	23.5883	1	25	0	0	0	0	0	0	0	0	0	0	0	0	0	0	0	0	0	0	0	0	0	0	0	0	0	0	0	0	0	1	0	1	1	3	6	72	0	1	0	0	0	0
115	1	60.3203	172	76	25.6896	1	12.5	0	0	0	0	0	0	0	0	0	0	0	0	0	0	0	0	0	0	0	0	0	0	0	0	0	0	0	0	0	1	0	1	0				0	0	0	0	0	0
8	1	60.3231	175	70	22.8571	0	70	0	0	0	0	0	0	1	0	0	0	0	0	1	0	1	1	0	0	0	1	0	0	0	0	0	0	3	0	0	0	0	0	0				0	1	1	1	0	0
41	1	60.3422	180	86	26.5432	1	75	0	1	0	0	0	0	0	0	0	0	0	0	1	0	0	0	0	0	0	0	0	0	0	0	0	0	0	0	0	0	0	0	0				0	0	0	0	0	0
417	1	60.5284	170	72	24.9135	1	90	1	0	0	0	0	0	0	0	0	0	0	0	1	0	0	0	0	0	0	0	0	0	0	0	0	0	0	0	0	1	1	0	0				0	1	0	0	1	0
221	0	60.6242	155	55	22.8928	1	52.5	0	1	1	0	1	0	0	0	0	0	0	1	4	1	0	0	1	1	0	0	0	0	1	0	0	0	4	0	0	1	1	1	1	7	12	365	0	1	1	1	0	1
83	1	60.6845	168	74	26.2188	1	61.5	0	1	0	1	0	0	0	0	0	0	0	0	2	0	1	1	0	0	0	0	0	0	0	0	1	0	3	0	0	1	0	1	1	4	12	192	0	0	0	0	0	0
355	1	60.8022	187	88	25.1651	0	102.5	0	1	0	0	0	0	0	0	0	0	0	0	1	1	0	0	1	0	0	0	1	0	0	1	0	0	4	0	0	1	1	1	1	7	12	336	0	2	1	1	1	0
325	1	60.8186	175	83	27.102	1	40	0	0	0	0	0	0	0	0	0	0	0	0	0	0	0	0	0	0	0	0	0	0	0	0	0	0	0	0	0	1	1	1	0				0	1	0	0	1	0
369	0	60.8214	150	52	23.1111	1	45	0	0	0	0	0	0	0	0	0	0	0	0	0	0	0	0	0	0	0	0	0	0	0	0	0	0	0	0	0	1	1	1	1	4.5	12	216	0	0	0	0	0	0
439	0	60.8214	164	85	31.6032	1	22	1	1	1	0	1	0	0	0	0	0	0	0	3	0	0	0	0	1	0	0	0	0	1	0	0	0	2	0	0	0	0	0	0				0	0	0	0	0	0
137	1	60.9938	179	74	23.0954	1	35	0	0	0	0	0	0	0	0	0	0	0	0	0	0	0	0	0	0	0	0	0	0	0	0	0	0	0	0	0	1	0	1	0				0	0	0	0	0	1
448	1	61.0541	174	80	26.4236	0	40	0	1	0	0	0	0	0	0	0	0	0	0	1	0	0	0	0	0	0	0	0	0	0	0	0	0	0	0	0	0	0	0	0				0	0	0	0	1	0
223	1	61.065					20		0	0	0	0	0	0	0	0	0	0	0	0	0	0	0	0	0	0	0	0	0	0	0	0	0	0	0	0	0	0	0	0				0	0	0	0	0	0
52	0	61.3087	158	49	19.6283	1	40	0	1	0	0	0	0	0	0	0	0	0	0	1	0	1	1	0	0	0	0	0	0	0	0	0	0	2	0	0	1	1	1	1	5	12	240	1	1	0	1	1	0
145	1	61.3854	184	90	26.5832		40	0	0	0	0	0	0	0	0	0	0	0	0	0	0	0	0	0	0	0	0	0	0	0	0	0	0	0										0	0	0	0	0	0
79	0	61.399	156	57	23.4221	1	80	0	1	0	0	0	0	0	0	0	0	0	0	1	0	0	0	0	0	0	0	0	0	0	0	0	0	0	0	0	0	0	0	0				0	0	0	0	0	0
86	0	61.4127	164	75	27.8852	1	63	0	1	0	0	1	0	0	0	0	0	0	0	2	1	0	0	1	0	0	0	0	0	0	0	0	0	2	0	0	1	1	1	1	2	12	96	0	1	1	1	1	0
436	0	61.4812	165	60	22.0386	1	28	0	1	0	0	1	0	0	0	0	0	0	0	2	0	0	0	0	0	1	0	0	0	0	0	0	0	1	0	0	0	0	0	0				0	1	0	0	0	0
390	0	61.4976	163	78	29.3575	1	30	0	1	0	0	0	0	0	0	0	0	0	0	1	0	0	0	1	0	0	0	0	0	0	0	0	0	1	0	0	0	1	1	0				0	1	0	1	0	0
376	1	61.5003	168	75	26.5731	0	42	0	0	0	0	0	0	0	0	0	0	0	0	0	0	0	0	0	0	0	0	0	0	0	0	0	0	0	0	0	0	0	0	0				0	1	0	0	0	0
427	1	61.5305	173	83	27.7323	0	30	0	1	0	0	0	0	0	0	0	0	0	0	1	0	0	0	0	0	0	0	0	0	0	0	0	0	0	0	0	0	0	0	0				0	0	0	0	0	0
373	1	61.5469	167	82	29.4023	1	63	0	1	0	0	0	0	0	0	0	0	0	0	1	1	0	1	1	0	0	0	0	0	0	0	0	0	3	0	0	1	1	1	0				0	1	0	0	0	1
176	0	61.5661	160	84	32.8125	1	16.875	0	1	0	0	1	0	0	0	0	0	0	0	2	1	1	0	0	1	0	0	0	0	0	0	0	0	3	0	0	1	1	1	1	7	2	56	0	2	1	0	0	0
443	0	61.588	163	76	28.6048	1	32	0	1	0	0	0	0	0	0	0	0	1	0	2	0	0	0	0	0	0	0	0	0	0	0	0	0	0	0	0	1	1	1	1	7	1	28	0	1	0	0	1	1
219	0	61.6263	158	65	26.0375		20	0	0	0	0	0	0	0	0	0	0	0	0	0	0	0	0	0	0	0	0	0	0	0	0	0	0	0										0	0	0	0	0	0
332	1	61.64	179	87	27.1527	0	40	0	0	0	0	0	0	0	0	0	0	0	0	0	0	0	0	0	0	0	0	0	0	0	0	0	0	0	0	0	1	0	1	1	2	12	96	0	1	0	0	1	0
187	1	61.6783	180	130	40.1235	0	20	0	1	0	0	1	0	0	0	0	0	0	0	2	0	1	0	0	1	0	0	0	0	0	0	0	0	2	0	0	0	0	0	0				0	0	0	1	0	0
55	0	61.6947	170	81	28.0277	0	25	0	0	0	0	1	0	0	0	0	0	0	0	1	0	0	0	0	0	0	0	0	0	0	0	0	0	0	0	0	0	0	0	0				0	0	0	0	0	0
232	0	61.9302	170	60	20.7612	1	27.75	0	0	0	0	0	0	0	0	0	0	0	0	0	0	0	0	0	0	0	0	0	0	0	0	0	0	0	0	0	1	1	1	0				0	1	0	1	0	0
61	1	62.1081	188	100	28.2933	0	37	0	0	0	0	0	0	0	0	0	0	0	0	0	0	0	0	0	0	0	0	0	0	0	0	0	0	0	0	0	0	0	0	0				0	1	0	0	1	0
397	0	62.1793	162	85	32.3884	1	53	1	1	1	0	0	0	0	0	0	0	0	0	3	1	0	0	0	0	0	0	1	0	0	0	0	0	2	0	1	1	1	1	1	3	12	144	0	3	1	1	1	0
423	1	62.1985	166	67	24.3141	1	55	0	1	0	0	0	0	0	0	0	0	0	0	1	0	0	0	0	0	0	0	0	0	0	1	0	0	1	0	0	0	0	1	0				1	2	1	1	1	0
241	1	62.2998	183	96	28.6661	1	63	0	0	0	0	0	0	0	0	0	0	0	0	0	0	0	0	0	0	0	0	0	0	0	0	0	0	0	0	0	1	0	0	0				0	1	0	0	1	0
184	0	62.371	160	67	26.1719	1	80	0	0	0	0	0	0	0	0	0	0	0	0	0	0	1	0	0	0	0	0	0	0	0	1	0	0	2	0	0	0	1	1	1	1	12	48	1	3	1	0	1	0
132	0	62.4093	160	61	23.8281	1	24.75	0	1	0	0	0	0	0	0	0	0	0	0	1	0	0	0	0	0	0	0	0	0	0	0	0	0	0	1	1	0	0	0	0				0	0	1	1	0	1
298	0	62.4778	163	63	23.7118	1	30	0	0	0	0	0	0	0	0	0	0	0	0	0	0	0	0	0	0	0	0	0	0	0	0	0	0	0	0	0	1	0	1	0				0	0	0	0	1	0
438	0	62.7105	158	67	26.8386	1	26	1	0	0	0	1	0	0	0	0	0	0	0	1	0	0	0	0	0	1	0	0	0	0	0	0	0	1	0	0	1	0	1	0				0	1	0	0	1	1
68	1	62.7817	188	102	28.8592	0	30	0	1	0	0	1	0	0	0	0	0	0	0	2	0	0	0	0	1	0	0	0	0	0	0	0	0	1	0	0	0	0	1	1	7	1	28	0	0	0	0	0	0
234	0	62.9459	170	100	34.6021	1	98	0	1	0	0	0	0	0	0	0	0	0	0	1	0	0	1	1	1	0	0	0	0	0	0	0	0	3	0	0	1	1	0	0				0	2	0	1	1	0
171	1	63.0089	172	87	29.4078	1	112.5	0	0	0	0	0	0	0	0	0	0	0	0	0	0	0	0	0	0	0	0	0	0	0	0	0	0	0	0	0	0	0	0	0				0	0	0	0	1	0
177	1	63.1814	172	72	24.3375	1	30	0	0	0	0	0	0	0	1	0	0	0	0	1	0	1	0	0	1	0	1	0	0	0	0	0	0	3	0	0	1	1	1	1	7	12	365	0	2	0	0	0	1
56	0	63.2005	157	73	29.6158	0	40	0	1	0	0	0	0	0	0	0	0	0	0	1	1	0	0	0	0	0	0	0	0	0	0	0	0	1	0	0	0	0	1	1	5	1	20	0	0	0	0	1	0
314	1	63.269	170	81	28.0277	1	40	0	1	0	0	0	0	0	0	0	0	0	1	2	1	1	0	0	1	0	0	1	0	0	0	0	0	4	0	0	1	0	1	1	7	12	336	0	0	0	0	1	0
89	1	63.2964	179	70	21.847	1	64.5	0	0	0	0	0	0	0	0	0	0	0	0	0	0	0	0	0	0	0	0	0	0	0	0	0	0	0	0	0	0	0	1	1	0.25	12	12	0	0	0	0	0	0
161	0	63.499	168	75	26.5731	1	21.875	0	0	0	0	0	0	0	0	0	0	0	0	0	0	0	1	0	0	0	0	0	0	0	0	0	0	1	0	0	1	1	1	1	3	12	144	0	0	0	0	1	0
91	1	63.7016	187	90	25.7371	0	40	0	0	0	0	0	0	0	0	0	0	0	0	0	0	0	0	0	0	0	0	0	0	0	0	0	0	0	0	0	0	0	0	0				0	0	0	0	0	0
324	1	63.8138	182	115	34.718	0	38	0	1	0	0	0	0	0	0	0	0	0	0	1	1	1	0	0	0	0	0	0	0	0	0	0	0	2	0	0	0	0	0	0				0	2	0	0	0	0
319	0	63.8823	162	82	31.2452	1	22.5	0	1	0	0	0	0	0	0	0	0	0	0	1	1	0	0	0	0	0	0	0	0	0	0	0	0	1	0	0	0	0	0	0				0	1	0	0	0	0
88	1	64.0958	182	120	36.2275	0	20	0	1	0	0	0	0	0	0	0	0	0	0	1	0	0	0	1	0	0	0	0	0	0	0	0	0	1	0	0	0	0	0	0				0	0	0	0	0	0
144	1	64.1287	180	79	24.3827	0	64.75	0	0	0	0	0	0	0	1	0	0	0	0	1	0	1	0	0	1	0	1	0	0	0	0	0	0	3	0	0	0	0	0	0				0	1	0	0	1	1
109	1	64.2382	185	75	21.9138	1	40	0	0	0	0	0	0	0	0	0	0	0	0	0	0	0	0	0	0	0	0	0	0	0	0	0	0	0	0	0	1	1	1	1	1	12	48	1	1	0	1	1	0
445	0	64.3313	161	49	18.9036	1	23	0	1	0	0	0	0	0	0	0	0	0	0	1	0	0	0	0	0	0	0	0	0	0	0	0	0	0	0	0	0	0	0	0				0	0	0	0	0	0
155	0	64.6352	159	78	30.8532	1	25	0	0	0	0	0	0	0	0	0	0	0	0	0	0	0	0	0	0	0	0	0	0	0	0	0	0	0	0	0	1	1	1	1	2	12	96	0	0	1	1	0	1
267	1	64.6407	185	99	28.9262	1	57	0	1	0	0	0	0	0	0	0	0	0	0	1	0	0	1	1	0	0	0	0	0	0	0	0	0	2	0	0	1	0	1	1	2	12	96	0	2	0	1	1	0
87	0	65.1526	163	85	31.9922	1	20	0	0	0	0	1	0	0	0	0	0	0	0	1	1	0	0	1	1	0	0	0	0	0	0	0	0	3	0	0	1	0	1	0				0	0	0	1	0	0
180	1	65.2266	171	83	28.3848	0	60	0	1	1	0	0	0	0	0	0	0	0	0	2	0	0	0	0	1	0	1	0	0	0	0	0	0	2	0	0	1	1	1	1	7	3	84	0	3	1	1	0	1
316	1	65.2594	178	80	25.2493	0	25	1	1	0	0	0	0	0	0	0	0	0	0	2	0	0	0	1	0	0	0	0	0	0	0	0	0	1	0	0	0	0	0	0				0	0	0	0	0	0
409	0	65.6263	170	94	32.526	1	22.5	0	1	0	0	0	0	0	0	0	0	0	0	1	0	0	0	0	0	0	0	0	0	0	0	0	0	0	0	0	0	0	0	0				0	1	0	0	0	0
434	0	65.629	165	70	25.7117	1	30	0	1	0	0	0	0	0	0	0	0	0	0	1	1	0	0	0	0	0	0	0	0	0	0	0	0	1	0	0	0	0	0	0				0	1	0	0	0	0
356	0	65.7823	164	78	29.0006	1	20	0	1	0	0	0	0	0	0	0	1	0	0	2	0	0	0	0	0	1	0	0	0	0	0	0	0	1	0	0	0	0	0	0				0	1	0	0	0	1
446	1	65.859	175	83	27.102	1	34	0	0	0	0	0	0	0	0	0	0	0	0	0	0	0	0	0	0	0	0	0	0	0	0	0	0	0	0	0	1	1	1	1	6	12	288	0	1	0	1	0	1
382	1	66.7461	180	74	22.8395	1	67.5	0	0	0	0	0	0	0	0	0	0	0	0	0	0	0	0	0	0	0	0	0	0	0	0	0	0	0	0	1	0	1	1	0				1	2	0	1	1	0
404	0	67.9261	158	57	22.8329	1	27	1	0	0	0	0	0	0	0	0	0	0	0	1	0	0	0	0	0	0	0	0	0	0	0	0	0	0	0	1	0	1	1	1				0	1	1	1	0	0
142	0	68.1889	162	75	28.578	1	22.5	0	0	0	0	0	0	0	0	0	0	0	0	0	0	0	0	0	0	0	0	0	0	0	0	0	0	0	1	0	1	0	1	1	1	1	4	0	0	0	0	0	1
402	1	69.1745	175	87	28.4082	0	60	0	0	0	0	0	0	0	0	0	0	0	0	0	0	0	0	0	0	0	0	0	0	0	0	0	0	0	0	0	0	0	0	0				0	1	0	0	1	0
386	0	69.7112	162	55	20.9572	1	50	1	0	0	0	0	0	0	0	0	0	0	0	1	0	0	0	0	0	0	0	0	0	0	0	0	0	0	0	0	0	0	0	0				0	1	0	1	0	0
312	1	69.911	174	93	30.7174	1	50	0	1	0	0	0	0	0	0	0	0	0	0	1	0	1	1	1	1	0	0	0	0	0	0	0	0	4	0	0	1	1	1	0				0	1	1	0	1	1
361	0	69.9329	158	76	30.4438	0	75	0	1	1	0	0	0	0	0	0	0	0	0	2	1	1	0	0	1	0	0	0	0	0	0	0	0	3	0	0	1	1	1	1	4	12	192	0	3	0	1	1	0
375	1	77.8207	176	76	24.5351	0	30	0	0	0	0	0	0	0	0	0	0	0	0	0	0	0	0	0	0	0	0	0	0	0	0	0	0	0	0	0	0	0	0	0				0	2	0	0	0	0
[truncated: 152 more columns]
